# 1     **Interventions targeting nonsymptomatic cases can be important to** 2                   **prevent local outbreaks: SARS-CoV-2 as a case-study**

3

## 4     **Authors**

5     Francesca A. Lovell-Read<sup>1\*</sup>, Sebastian Funk<sup>2</sup>, Uri Obolski<sup>3,4</sup>, Christl A. Donnelly<sup>5,6</sup>, Robin N.  
6     Thompson<sup>1,2,7,8</sup>

7

## 8     **Affiliations**

9     <sup>1</sup>Mathematical Institute, University of Oxford, Oxford, UK

10    <sup>2</sup>Centre for Mathematical Modelling of Infectious Diseases, London School of Hygiene &  
11    Tropical Medicine, London, UK

12    <sup>3</sup>Porter School of the Environment and Earth Sciences, Tel Aviv University, Tel Aviv, Israel

13    <sup>4</sup>School of Public Health, Tel Aviv University, Tel Aviv, Israel

14    <sup>5</sup>Department of Statistics, University of Oxford, Oxford, UK

15    <sup>6</sup>MRC Centre for Global Infectious Disease Analysis, Department of Infectious Disease  
16    Epidemiology, Imperial College London, London, UK

17    <sup>7</sup>Mathematics Institute, University of Warwick, Coventry, UK

18    <sup>8</sup>The Zeeman Institute for Systems Biology and Infectious Disease Epidemiology Research,  
19    University of Warwick, Coventry, UK

20

## 21    \* **Corresponding author**

22    Address: Merton College, Merton Street, Oxford, OX1 4JD

23    E-mail: [francesca.lovell-read@merton.ox.ac.uk](mailto:francesca.lovell-read@merton.ox.ac.uk). Tel: +44 (0)7511 676 592.

24

## 25 **Abstract**

26 During infectious disease epidemics, an important question is whether cases travelling to new  
27 locations will trigger local outbreaks. The risk of this occurring depends on the transmissibility of  
28 the pathogen, the susceptibility of the host population and, crucially, the effectiveness of  
29 surveillance in detecting cases and preventing onward spread. For many pathogens, transmission  
30 from presymptomatic and/or asymptomatic (together referred to as nonsymptomatic) infectious  
31 hosts can occur, making effective surveillance challenging. Here, using SARS-CoV-2 as a case-  
32 study, we show how the risk of local outbreaks can be assessed when nonsymptomatic  
33 transmission can occur. We construct a branching process model that includes nonsymptomatic  
34 transmission, and explore the effects of interventions targeting nonsymptomatic or symptomatic  
35 hosts when surveillance resources are limited. We consider whether the greatest reductions in local  
36 outbreak risks are achieved by increasing surveillance and control targeting nonsymptomatic or  
37 symptomatic cases, or a combination of both. We find that seeking to increase surveillance of  
38 symptomatic hosts alone is typically not the optimal strategy for reducing outbreak risks. Adopting  
39 a strategy that combines an enhancement of surveillance of symptomatic cases with efforts to find  
40 and isolate nonsymptomatic infected hosts leads to the largest reduction in the probability that  
41 imported cases will initiate a local outbreak.

42

## 43 **Keywords**

44 mathematical modelling; infectious disease epidemiology; SARS-CoV-2; COVID-19;  
45 presymptomatic infection; asymptomatic infection; disease surveillance

46

## 47 **1. Introduction**

48 Emerging epidemics represent a substantial challenge to human health worldwide [1-4]. When  
49 cases are clustered in specific locations, two key questions are: i) Will exported cases lead to local  
50 outbreaks in new locations? and ii) Which surveillance and control strategies in those new  
51 locations will reduce the risk of local outbreaks?

52  
53 Branching process models are used for a range of diseases to assess whether cases that are newly  
54 arrived in a host population will generate a local outbreak driven by sustained local transmission  
55 [5-11]. These models can also be used to predict the effectiveness of potential control  
56 interventions. For example, early in the COVID-19 pandemic, Hellewell *et al.* [12] used  
57 simulations of a branching process model to predict whether or not new outbreaks would fade out  
58 under different contact tracing strategies. Thompson [13] estimated the probability of local  
59 outbreaks analytically using a branching process model and found that effective isolation of  
60 infectious hosts leads to a substantial reduction in the outbreak risk.

61  
62 A factor that can hinder control interventions during any epidemic is the potential for individuals  
63 to transmit a pathogen while not showing symptoms. For COVID-19, the incubation period has  
64 been estimated to last approximately five or six days on average [14, 15], and presymptomatic  
65 transmission can occur during that period [16-20]. Additionally, asymptomatic infected individuals  
66 (those who never develop symptoms) are also thought to contribute to transmission [16, 21, 22].

67  
68 Motivated by the need to assess the risk of outbreaks outside China early in the COVID-19  
69 pandemic, we show how the risk that imported cases will lead to local outbreaks can be estimated  
70 using a branching process model. Unlike standard approaches for estimating the probability of a  
71 major epidemic analytically [23-26], nonsymptomatic individuals are included in the model

72 explicitly. Using a function that characterises the efficacy of interventions for different  
73 surveillance efforts (denoted  $f(\rho, \delta)$  in the model), we explore the effects of interventions that aim  
74 to reduce this risk. Under the assumption that detected infected hosts are isolated effectively, we  
75 consider whether it is most effective to dedicate resources to enhancing surveillance targeting  
76 symptomatic individuals, to instead focus on increasing surveillance for nonsymptomatic  
77 individuals, or to use a combination of these approaches.

78  
79 We show that, when surveillance resources are limited, the maximum reduction in the outbreak  
80 risk almost always corresponds to a mixed strategy involving enhanced surveillance of both  
81 symptomatic and nonsymptomatic hosts. This remains the case even if the surveillance effort  
82 required to find nonsymptomatic infected individuals is significantly larger than the effort required  
83 to find symptomatic individuals. This highlights the benefits of not only seeking to find and isolate  
84 symptomatic hosts, but also dedicating resources to detecting nonsymptomatic cases during  
85 infectious disease epidemics.

86

## 87 **2. Methods**

### 88 **2.1 Model**

89 We consider a branching process model in which infectious individuals are classified as  
90 asymptomatic ( $A$ ), presymptomatic ( $I_1$ ) or symptomatic ( $I_2$ ). Hosts in any of these classes may  
91 generate new infections. The parameter  $\xi$  represents the proportion of new infections that are  
92 asymptomatic, so that a new infection either involves increasing  $A$  by one (with probability  $\xi$ ) or  
93 increasing  $I_1$  by one (with probability  $1 - \xi$ ).

94

95 Presymptomatic hosts may go on to develop symptoms (transition from  $I_1$  to  $I_2$ ) or be detected and  
 96 isolated (so that  $I_1$  decreases by one). Symptomatic individuals ( $I_2$ ) can be isolated (so that  $I_2$   
 97 decreases by one) or be removed due to recovery or death (so that again  $I_2$  decreases by one).  
 98 Similarly, asymptomatic hosts may be detected and isolated, or recover (so that  $A$  decreases by  
 99 one in either case).

100  
 101 A schematic showing the different possible events in the model is shown in Fig 1A. The analogous  
 102 compartmental differential equation model to the branching process model that we consider is  
 103 given by

$$104 \quad \frac{dA}{dt} = \xi(\eta\beta A + \alpha\beta I_1 + \beta I_2) - \frac{\varepsilon\gamma}{1 - f(\rho_1, \delta)} A - \nu A,$$

$$105 \quad \frac{dI_1}{dt} = (1 - \xi)(\eta\beta A + \alpha\beta I_1 + \beta I_2) - \frac{\varepsilon\gamma}{1 - f(\rho_1, \delta)} I_1 - \lambda I_1,$$

$$106 \quad \frac{dI_2}{dt} = \lambda I_1 - \frac{\gamma}{1 - f(\rho_2, \delta)} I_2 - \mu I_2.$$

107 The parameters of the model, and the form of the function  $f(\rho, \delta)$  that describes how the expected  
 108 time to isolation is reduced for a given surveillance effort, are outlined below.

109

A.

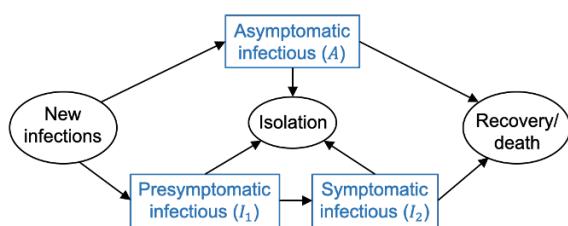

B.

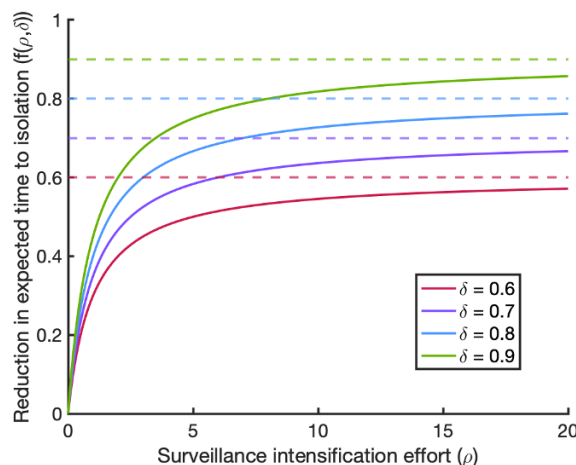

110

111 **Fig 1. The branching process model used in our analyses.** A. Schematic showing the different event  
112 types in the branching process model. The parameters of the model are described in the text and in Table  
113 1. B. The relationship between the surveillance intensification effort ( $\rho$ ) and the proportional reduction in  
114 the expected time to isolation ( $f(\rho, \delta)$ ), shown for different values of the parameter  $\delta$  (solid lines). The  
115 parameter  $\delta \in (0,1)$  represents the upper bound of  $f(\rho, \delta)$  (dotted lines). This general functional  
116 relationship between surveillance effort and isolation effectiveness is assumed to hold for surveillance of  
117 both nonsymptomatic and symptomatic individuals, although nonsymptomatic hosts are more challenging  
118 to detect than symptomatic hosts ( $\varepsilon < 1$ ).

119  
120 In our model, the parameter  $\beta$  and its scaled counterparts  $\alpha\beta$  and  $\eta\beta$  represent the rates at which  
121 symptomatic, presymptomatic and asymptomatic hosts generate new infections, respectively.  
122 Since we are modelling the beginning of a potential local outbreak, we assume that the size of the  
123 susceptible population remains approximately constant and do not track the depletion of this  
124 population. The parameter  $\lambda$  governs the rate at which presymptomatic individuals develop  
125 symptoms, so that the expected duration of the presymptomatic period is  $1/\lambda$  days in the absence  
126 of interventions. Similarly, without interventions, the expected durations of the symptomatic and  
127 asymptomatic infectious periods are  $1/\mu$  days and  $1/\nu$  days, respectively.

128  
129 The baseline rate at which symptomatic individuals are detected and isolated is determined by the  
130 parameter  $\gamma$ . Assuming that nonsymptomatic individuals are more difficult to detect than  
131 symptomatic individuals, we take the analogous quantity for nonsymptomatic hosts to be  $\varepsilon\gamma$ ,  
132 where the scaling factor  $\varepsilon < 1$  reflects the fact that interventions targeting nonsymptomatic hosts  
133 are likely to be less effective for the same surveillance effort. We assume that the sensitivity of  
134 surveillance is identical for presymptomatic and asymptomatic individuals, and therefore use the  
135 same isolation rate for both of these groups.

136  
137 The parameters  $\rho_1$  and  $\rho_2$  represent the surveillance intensification effort targeted at  
138 nonsymptomatic and symptomatic hosts, respectively. The function  $f(\rho, \delta) = \frac{\delta\rho}{1+\rho}$  governs the  
139 proportional reduction in the expected time to isolation for a given surveillance effort,  $\rho$  (for a  
140 similar approach in which the proportion of infectious cases prevented is assumed to be a function  
141 of control effort, see Matthews *et al.* [27]). The functional form of  $f(\rho, \delta)$  is chosen for three main  
142 reasons. First, it generates a reduced expected time to isolation when the surveillance effort  
143 increases. Second, since the proportional reduction in the expected time to isolation is bounded  
144 above by the parameter  $\delta \in (0,1)$ , the isolation rate saturates and cannot increase indefinitely.  
145 Third, the gradient  $\frac{\partial f}{\partial \rho}$  decreases with the surveillance effort  $\rho$ , meaning that an increase in the  
146 surveillance effort has a greater impact at low surveillance efforts compared to when this effort is  
147 already large [27]. The function  $f(\rho, \delta)$  is shown in Fig 1B for different values of the parameter  $\delta$ .

148

## 149 **2.2 Reproduction number**

150 The basic reproduction number,  $R_0$ , represents the expected number of secondary infections  
151 generated by a single infected individual introduced at the start of their infection into a fully  
152 susceptible population in the absence of intensified surveillance:

$$153 \quad R_0 = \frac{\xi\eta\beta}{\nu + \epsilon\gamma} + (1 - \xi) \left[ \frac{\alpha\beta}{\lambda + \epsilon\gamma} + \frac{\lambda}{\lambda + \epsilon\gamma} \frac{\beta}{\gamma + \mu} \right].$$

154 This expression is the sum of the expected number of transmissions from a host who begins in the  
155 asymptomatic class and from a host who begins in the presymptomatic infectious class, weighted  
156 by the respective probabilities  $\xi$  and  $1 - \xi$  that determine the chance that the host experiences a  
157 fully asymptomatic course of infection. The expected number of transmissions from a host who  
158 begins in the presymptomatic infectious class comprises transmissions occurring during the

159 incubation period and transmissions occurring during the symptomatic period, accounting for the  
160 possibility that the host is isolated prior to developing symptoms.

161  
162 The proportion of infections arising from presymptomatic hosts in the absence of intensified  
163 surveillance is then given by

164 
$$K_p = \frac{\frac{(1 - \xi)\alpha}{\lambda + \epsilon\gamma}}{\frac{\xi\eta}{\nu + \epsilon\gamma} + (1 - \xi) \left[ \frac{\alpha}{\lambda + \epsilon\gamma} + \frac{\lambda}{\lambda + \epsilon\gamma} \frac{1}{\gamma + \mu} \right]}, \quad (1)$$

165 and the equivalent quantity for asymptomatic hosts is given by

166 
$$K_a = \frac{\frac{\xi\eta}{\nu + \epsilon\gamma}}{\frac{\xi\eta}{\nu + \epsilon\gamma} + (1 - \xi) \left[ \frac{\alpha}{\lambda + \epsilon\gamma} + \frac{\lambda}{\lambda + \epsilon\gamma} \frac{1}{\gamma + \mu} \right]}. \quad (2)$$

167

### 168 **2.3 Baseline values of model parameters**

169 Since this research was motivated by the need to estimate outbreak risks outside China in the  
170 initial stages of the COVID-19 pandemic, we used a baseline set of parameter values in our  
171 analyses that was informed by studies conducted during this pandemic (Table 1). Where possible,  
172 these parameter values were obtained from existing literature. However, we also performed  
173 sensitivity analyses to determine how our results varied when the parameter values were changed  
174 (see Supplementary Text S3 and Supplementary Figs S3-12). In Table 1, and throughout, rounded  
175 values are given to three significant figures.

176

177 **Table 1. Parameters of the model and the values used in the baseline version of our analysis.**

| Parameter | Meaning                                                    | Baseline value | Justification                                 |
|-----------|------------------------------------------------------------|----------------|-----------------------------------------------|
| $R_0$     | Expected number of secondary infections caused by a single | $R_0 = 3$      | Within estimated range for SARS-CoV-2 [28-31] |



|               |                                                                                                                              |                                              |                                                                                                                                                                                          |
|---------------|------------------------------------------------------------------------------------------------------------------------------|----------------------------------------------|------------------------------------------------------------------------------------------------------------------------------------------------------------------------------------------|
|               | infected individual (when $\rho_1 = \rho_2 = 0$ )                                                                            |                                              |                                                                                                                                                                                          |
| $\xi$         | Proportion of infections that are asymptomatic                                                                               | $\xi = 0.2$                                  | [32-34]                                                                                                                                                                                  |
| $\beta$       | Rate at which symptomatic individuals generate new infections                                                                | $\beta = 0.336$ days <sup>-1</sup>           | Chosen so that $R_0 = 3$                                                                                                                                                                 |
| $\alpha$      | Relative infectiousness of presymptomatic individuals compared to symptomatic individuals                                    | $\alpha = 2.78$                              | Chosen so that 48.9% of transmissions arise from presymptomatic hosts (i.e. $K_p = 0.489$ ) [16]                                                                                         |
| $\eta$        | Relative infectiousness of asymptomatic individuals compared to symptomatic individuals                                      | $\eta = 0.519$                               | Chosen so that 10.6% of transmissions arise from asymptomatic hosts (i.e. $K_a = 0.106$ ) [16]                                                                                           |
| $\gamma$      | Isolation rate of symptomatic individuals without intensified surveillance                                                   | $\gamma = 0.0924$ days <sup>-1</sup>         | Chosen so that $\frac{1}{\gamma+\mu} = 4.6$ days [35]                                                                                                                                    |
| $\varepsilon$ | Relative isolation rate of nonsymptomatic individuals without intensified surveillance (compared to symptomatic individuals) | $\varepsilon = 0.1$                          | Assumed; chosen within the range $\varepsilon \in (0,1)$ (for different values, see Fig S7)                                                                                              |
| $\lambda$     | Rate at which presymptomatic individuals develop symptoms                                                                    | $\lambda = 0.5$ days <sup>-1</sup>           | [20]                                                                                                                                                                                     |
| $\mu$         | Recovery rate of symptomatic individuals                                                                                     | $\mu = 1/8$ days <sup>-1</sup>               | [36-38]                                                                                                                                                                                  |
| $\nu$         | Recovery rate of asymptomatic individuals                                                                                    | $\nu = 0.1$ days <sup>-1</sup>               | Chosen so that, in the absence of interventions, the expected duration of infection is identical for all infected hosts $\left(\frac{1}{\nu} = \frac{1}{\lambda} + \frac{1}{\mu}\right)$ |
| $\delta$      | Upper bound on the fractional reduction in the time to isolation                                                             | $\delta = 0.8$                               | Assumed; chosen within the natural range $\delta \in (0,1)$ (for different values, see Fig S11)                                                                                          |
| $\rho_1$      | Surveillance intensification effort targeted at nonsymptomatic hosts                                                         | $\rho_1$ allowed to vary in the range [0,20] | N/A – range of values explored                                                                                                                                                           |
| $\rho_2$      | Surveillance intensification effort targeted at symptomatic hosts                                                            | $\rho_2$ allowed to vary in the range [0,20] | N/A – range of values explored                                                                                                                                                           |

178

179 The value of the parameter governing the baseline rate at which symptomatic individuals are

180 isolated,  $\gamma$ , was chosen to match empirical observations which indicate that individuals who seek

181 medical care prior to recovery or death do so around four to six days after symptom onset [35].  
182 Specifically, we assumed that the period of time to the first medical visit could be used a proxy for  
183 the time to isolation, and chose  $\gamma$  so that the expected time period to isolation conditional on  
184 isolation occurring during the symptomatic period was given by  $\frac{1}{\gamma+\mu} = 4.6$  days [35]. This is  
185 different to the time period that we refer to as the expected time to isolation for symptomatic hosts,  
186 which is  $\frac{1}{\gamma}$  days (see Methods).

187

## 188 **2.4 Probability of a local outbreak**

189 For stochastic simulations of compartmental epidemiological models starting from a small number  
190 of hosts infected initially, there are generally two qualitatively different types of behaviour. The  
191 pathogen may fade out rapidly, or case numbers may begin to increase exponentially (only starting  
192 to fade out once the number of susceptible individuals has been sufficiently depleted, unless public  
193 health measures are introduced to reduce transmission). Consequently, running many simulations  
194 of those types of model with  $R_0$  larger than but not close to one, the epidemic size is distributed  
195 bimodally, with the total number of individuals ever infected falling into one of two distinct ranges  
196 (for a simple example, see Supplementary Fig S1A; see also [39-41]). In that scenario, a natural  
197 definition for the probability of a local outbreak is therefore the proportion of outbreak simulations  
198 for which the total number of infected individuals falls into the higher of these two ranges.

199

200 Here, since we are considering the initial phase of potential local outbreaks, we instead considered  
201 a branching process model in which depletion of susceptibles was not accounted for. If simulations  
202 of branching process models are run, then in each simulation the pathogen either fades out with  
203 few infections or case numbers generally increase indefinitely. The probability of a local outbreak

204 starting from a small number of infected hosts then corresponds to the proportion of simulations in  
205 which the pathogen does not fade out quickly and case numbers increase indefinitely instead. This  
206 again provides a natural definition of a local outbreak, since simulations can be partitioned into  
207 two distinct sets (for an example in which simulations of a simple branching process model are  
208 used to calculate the probability of a local outbreak, see Supplementary Fig S1B).

209  
210 As an alternative to repeated simulation, we instead use our branching process model (Fig 1A) to  
211 perform analytic calculations of the probability that a single imported infectious host initiates a  
212 local outbreak. To do this, we denote the probability of a local outbreak not occurring, starting  
213 from  $i$  presymptomatic hosts,  $j$  symptomatic hosts, and  $k$  asymptomatic hosts, by  $q_{i,j,k}$ . Starting  
214 from one presymptomatic host (so that  $i = 1$  and  $j = k = 0$ ), there are four possibilities for the  
215 next event. That host could:

216 i) generate a new asymptomatic infection (with probability  $\frac{\xi\alpha\beta}{\alpha\beta+\lambda+\frac{\varepsilon\gamma}{1-f(\rho_1,\delta)}}$ );

217 ii) generate a new presymptomatic infection (with probability  $\frac{(1-\xi)\alpha\beta}{\alpha\beta+\lambda+\frac{\varepsilon\gamma}{1-f(\rho_1,\delta)}}$ );

218 iii) develop symptoms (with probability  $\frac{\lambda}{\alpha\beta+\lambda+\frac{\varepsilon\gamma}{1-f(\rho_1,\delta)}}$ ), or;

219 iv) be isolated (with probability  $\frac{\frac{\varepsilon\gamma}{1-f(\rho_1,\delta)}}{\alpha\beta+\lambda+\frac{\varepsilon\gamma}{1-f(\rho_1,\delta)}}$ ).

220 These probabilities are obtained by considering the rates at which different possible events occur  
221 in the branching process model. Presymptomatic hosts generate new infections at rate  $\alpha\beta$ , and  
222 these new infections occur in asymptomatic and presymptomatic hosts with probabilities  $\xi$  and  
223  $1 - \xi$ , respectively. Therefore, starting from a single presymptomatic host, new asymptomatic  
224 infections occur at rate  $\xi\alpha\beta$ , whilst new presymptomatic infections occur at rate  $(1 - \xi)\alpha\beta$ .

225 Additionally, presymptomatic hosts develop symptoms at rate  $\lambda$ , and are isolated at rate  $\frac{\epsilon\gamma}{1-f(\rho_1, \delta)}$ .

226 The overall rate at which events occur is the sum of these individual event rates:

227 
$$\text{Total event rate} = \alpha\beta + \lambda + \frac{\epsilon\gamma}{1-f(\rho_1, \delta)}.$$

228 For each of the four possible next events (i-iv, above), the probability that event occurs next is the  
 229 individual rate at which that event occurs divided by the total event rate, leading to the expressions  
 230 given.

231  
 232 We use these probabilities to condition on the event that occurs next in the branching process,  
 233 following the introduction of a single presymptomatic infectious individual into the population. If  
 234 that event is the generation of a new asymptomatic infection, which occurs with probability

235  $\frac{\xi\alpha\beta}{\alpha\beta + \lambda + \frac{\epsilon\gamma}{1-f(\rho_1, \delta)}}$ , the probability that a local outbreak subsequently does not occur is  $q_{1,0,1}$ . Applying

236 analogous reasoning to the other possible events, we obtain

237 
$$q_{1,0,0} = \frac{\xi\alpha\beta}{\alpha\beta + \lambda + \frac{\epsilon\gamma}{1-f(\rho_1, \delta)}} q_{1,0,1} + \frac{(1-\xi)\alpha\beta}{\alpha\beta + \lambda + \frac{\epsilon\gamma}{1-f(\rho_1, \delta)}} q_{2,0,0} + \frac{\lambda}{\alpha\beta + \lambda + \frac{\epsilon\gamma}{1-f(\rho_1, \delta)}} q_{0,1,0} + \frac{\frac{\epsilon\gamma}{1-f(\rho_1, \delta)}}{\alpha\beta + \lambda + \frac{\epsilon\gamma}{1-f(\rho_1, \delta)}} q_{0,0,0}.$$

238  
 239 If there are no infectious hosts present in the population (i.e.  $i = j = k = 0$ ), then a local outbreak  
 240 will not occur and so  $q_{0,0,0} = 1$ . Assuming that transmission chains arising from two infectious  
 241 individuals are independent gives  $q_{1,0,1} = q_{1,0,0} q_{0,0,1}$  and  $q_{2,0,0} = q_{1,0,0}^2$ . Hence,

242 
$$q_{1,0,0} = a\xi q_{1,0,0} q_{0,0,1} + a(1-\xi)q_{1,0,0}^2 + bq_{0,1,0} + (1-a-b), \quad (3)$$

243 where  $a = \frac{\alpha\beta}{\alpha\beta + \lambda + \frac{\epsilon\gamma}{1-f(\rho_1, \delta)}}$ ,  $b = \frac{\lambda}{\alpha\beta + \lambda + \frac{\epsilon\gamma}{1-f(\rho_1, \delta)}}$ .

244

245 Similarly, considering the probability of a local outbreak failing to occur starting from a single  
 246 symptomatic host gives

$$247 \quad q_{0,1,0} = \frac{\xi\beta}{\beta + \frac{\gamma}{1-f(\rho_2,\delta)} + \mu} q_{0,1,1} + \frac{(1-\xi)\beta}{\beta + \frac{\gamma}{1-f(\rho_2,\delta)} + \mu} q_{1,1,0} + \frac{\frac{\gamma}{1-f(\rho_2,\delta)} + \mu}{\beta + \frac{\gamma}{1-f(\rho_2,\delta)} + \mu} q_{0,0,0}.$$

248 As before, noting that  $q_{0,0,0} = 1$  and assuming that different infection lineages are independent  
 249 leads to

$$250 \quad q_{0,1,0} = c\xi q_{0,1,0}q_{0,0,1} + c(1-\xi)q_{1,0,0}q_{0,1,0} + (1-c), \quad (4)$$

$$251 \quad \text{where } c = \frac{\beta}{\beta + \frac{\gamma}{1-f(\rho_2,\delta)} + \mu}.$$

252 Finally, considering the probability of a local outbreak failing to occur starting from a single  
 253 asymptomatic host gives

$$254 \quad q_{0,0,1} = d\xi q_{0,0,1}^2 + d(1-\xi)q_{1,0,0}q_{0,0,1} + (1-d), \quad (5)$$

$$255 \quad \text{where } d = \frac{\eta\beta}{\eta\beta + \nu + \frac{\epsilon\gamma}{1-f(\rho_1,\delta)}}.$$

256  
 257 Equations (3), (4) and (5) may be combined to give a single quartic equation for  $q_{0,0,1}$ , yielding  
 258 four sets of solutions for  $q_{1,0,0}$ ,  $q_{0,1,0}$  and  $q_{0,0,1}$  (see Supplementary Text S1). It is straightforward  
 259 to verify that  $q_{1,0,0} = q_{0,1,0} = q_{0,0,1} = 1$  is always a solution, and further solutions can be found  
 260 numerically. The appropriate solution to take is the minimal non-negative real solution  $q_{1,0,0} =$   
 261  $q_{1,0,0}^*$ ,  $q_{0,1,0} = q_{0,1,0}^*$ ,  $q_{0,0,1} = q_{0,0,1}^*$  (see Supplementary Text S1). Then, the probability of a local  
 262 outbreak occurring beginning from a single presymptomatic host is given by

$$263 \quad p_{1,0,0} = 1 - q_{1,0,0}^*,$$

264 with equivalent expressions holding for  $p_{0,1,0}$  and  $p_{0,0,1}$  (the probability of a local outbreak  
 265 occurring beginning from a single symptomatic host or a single asymptomatic host, respectively).

266

267 Throughout, we consider the probability  $p$  of a local outbreak starting from a single  
268 nonsymptomatic host entering the population, accounting for the possibility that the  
269 nonsymptomatic host is either presymptomatic or asymptomatic:

$$270 \quad p = (1 - \xi)p_{1,0,0} + \xi p_{0,0,1}.$$

271

## 272 **3. Results**

### 273 **3.1 Probability of a local outbreak**

274 We considered the effect of  $R_0$  and the duration of the presymptomatic and asymptomatic periods  
275 on the probability of a local outbreak when a nonsymptomatic host enters a new host population  
276 (Fig 2). We examined presymptomatic periods of length  $1/\lambda = 1$  day,  $1/\lambda = 2$  days and  $1/\lambda = 4$   
277 days; in each case, the duration of the asymptomatic period ( $1/\nu$  days) was adjusted so that the  
278 relative proportion of infections arising from asymptomatic hosts compared to presymptomatic  
279 hosts remained fixed ( $K_a/K_p = 0.218$ , as in the baseline case). If instead nonsymptomatic  
280 infections are not accounted for, the infectious period follows an exponential distribution and the  
281 probability of a local outbreak is given by  $p = 1 - 1/R_0$  (red dash-dotted line in Fig 2A).  
282 Including nonsymptomatic infection in the model therefore led to an increased risk of a local  
283 outbreak in the absence of surveillance intensification (Fig 2A).

284

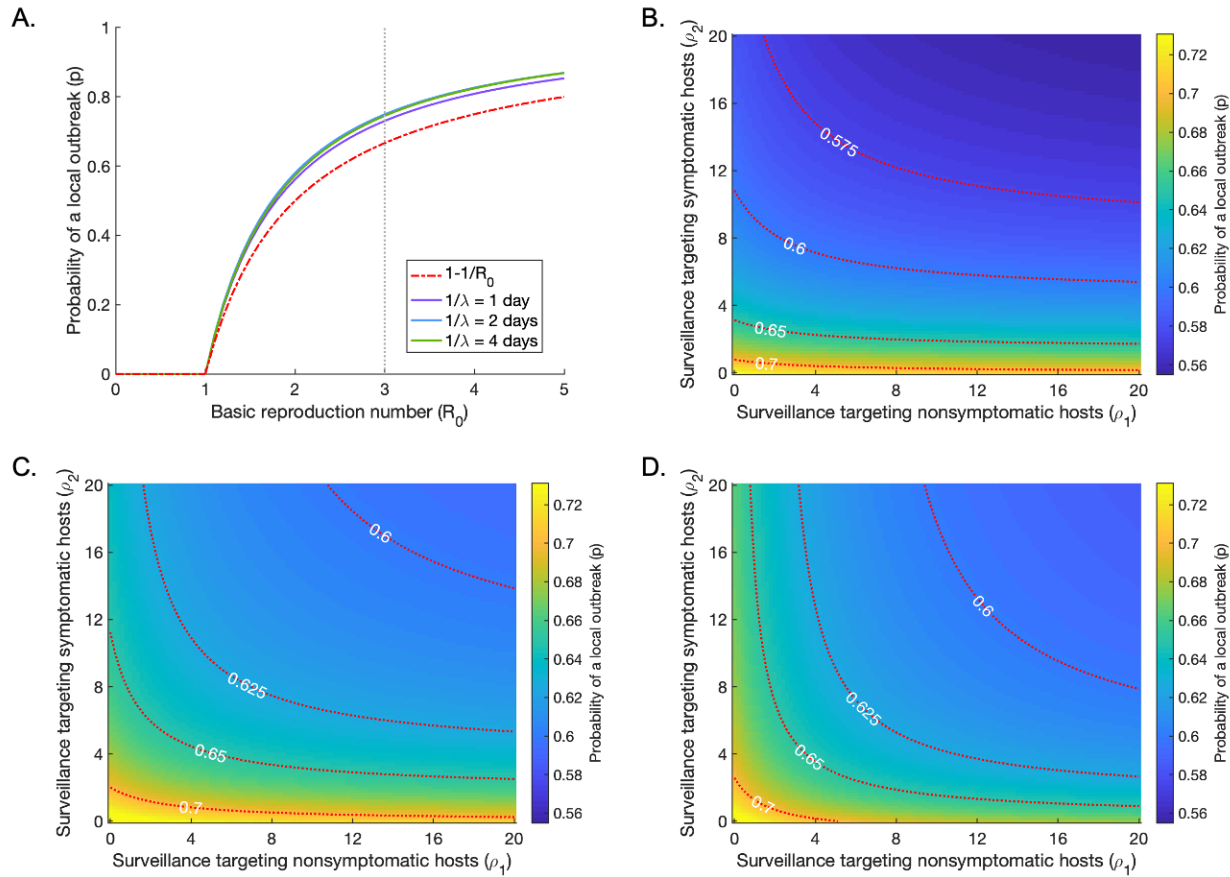

285

286

287

288

289

290

291

292

293

294

295

296

297

**Fig 2. The effect of the duration of the presymptomatic and asymptomatic periods on the probability of a local outbreak ( $p$ ), starting from a single nonsymptomatic host.** A. The probability of a local outbreak as a function of the basic reproduction number  $R_0$ , for presymptomatic periods of lengths  $1/\lambda = 1$  day (purple),  $1/\lambda = 2$  days (blue) and  $1/\lambda = 4$  days (green) in the absence of enhanced surveillance ( $\rho_1 = \rho_2 = 0$ ). In each case, the duration of the asymptomatic period ( $1/\nu$ ) is adjusted so that the relative proportion of infections arising from asymptomatic hosts compared to presymptomatic hosts remains constant ( $K_a/K_p = 0.218$ , as in the baseline case). The red dash-dotted line indicates the probability of a local outbreak in the absence of nonsymptomatic transmission. The vertical grey dotted line indicates  $R_0 = 3$ , the baseline value used throughout. B. The probability of a local outbreak as a function of the surveillance intensification efforts  $\rho_1$  and  $\rho_2$ , for  $1/\lambda = 1$  day. C. The analogous figure to B but with  $1/\lambda = 2$  days. D. The analogous figure to B but with  $1/\lambda = 4$  days. Red dotted lines indicate contours of constant local outbreak probability (i.e. lines on which the probability of a local outbreak takes the values shown). The

298 value of  $\beta$  is varied in each panel to fix  $R_0 = 3$ . All other parameter values are held fixed at the values in  
299 Table 1 (except where stated).

300  
301 We then considered the dependence of the probability of a local outbreak on the intensity of  
302 surveillance targeting nonsymptomatic and symptomatic hosts (Fig 2B-D). The maximum value of  
303 the surveillance intensification effort that we considered (given by  $\rho_1$  or  $\rho_2$  values of 20)  
304 corresponded to a 76% reduction in the expected time to isolation (blue line in Fig 1B), i.e. a 76%  
305 reduction in  $\frac{1}{\varepsilon\gamma}$  or  $\frac{1}{\gamma}$ .

306  
307 The length of the presymptomatic and asymptomatic periods significantly affected the dependence  
308 of the probability of a local outbreak on the level of surveillance targeted at nonsymptomatic and  
309 symptomatic hosts. In Fig 2B, in which the duration of the presymptomatic period was 1 day,  
310 increasing surveillance targeted at nonsymptomatic hosts ( $\rho_1$ ) had a limited effect on the  
311 probability of a local outbreak, while increasing surveillance targeted at symptomatic hosts ( $\rho_2$ )  
312 had a more significant effect. For example, increasing the surveillance effort targeted at  
313 nonsymptomatic hosts to  $\rho_1 = 5$  (a 67% reduction in the time to isolation) only reduced the  
314 probability of a local outbreak from 0.730 to 0.716, whereas the equivalent effort targeted at  
315 symptomatic hosts ( $\rho_2 = 5$ ) reduced the probability to 0.630. As shown in Figs 3C and D,  
316 however, when the presymptomatic and asymptomatic periods were longer, the benefit of directing  
317 surveillance resources towards detecting nonsymptomatic individuals increased. This was because  
318 longer presymptomatic and asymptomatic periods increased the proportion of infections generated  
319 by nonsymptomatic individuals ( $K_p + K_a$ , see equations (1) and (2)); a presymptomatic period of 1  
320 day, 2 days and 4 days corresponded to values of  $K_p + K_a$  equal to 0.424, 0.595 and 0.746,  
321 respectively.



322

### 323 **3.2 Optimising surveillance enhancement**

324 We next considered in more detail the impact of surveillance targeted at nonsymptomatic hosts  
325 ( $\rho_1$ ) relative to the impact of surveillance targeted at symptomatic hosts ( $\rho_2$ ). For our baseline  
326 parameter values, we considered the probability of a local outbreak starting from a single imported  
327 nonsymptomatic individual for a range of values of  $\rho_1$  and  $\rho_2$ . We calculated the steepest descent  
328 contours (white lines in Fig 3A) numerically using a gradient maximisation approach, in which at  
329 each point the contour direction was determined by minimising the local outbreak probability over  
330 a fixed search radius (see Supplementary Text S2 and Supplementary Fig S2). These contours  
331 indicate how  $\rho_1$  and  $\rho_2$  should be altered to maximise the reduction in the probability of a local  
332 outbreak. In this case, enhancing surveillance targeting both symptomatic and nonsymptomatic  
333 hosts is always optimal (the steepest descent contours are neither horizontal nor vertical).

334

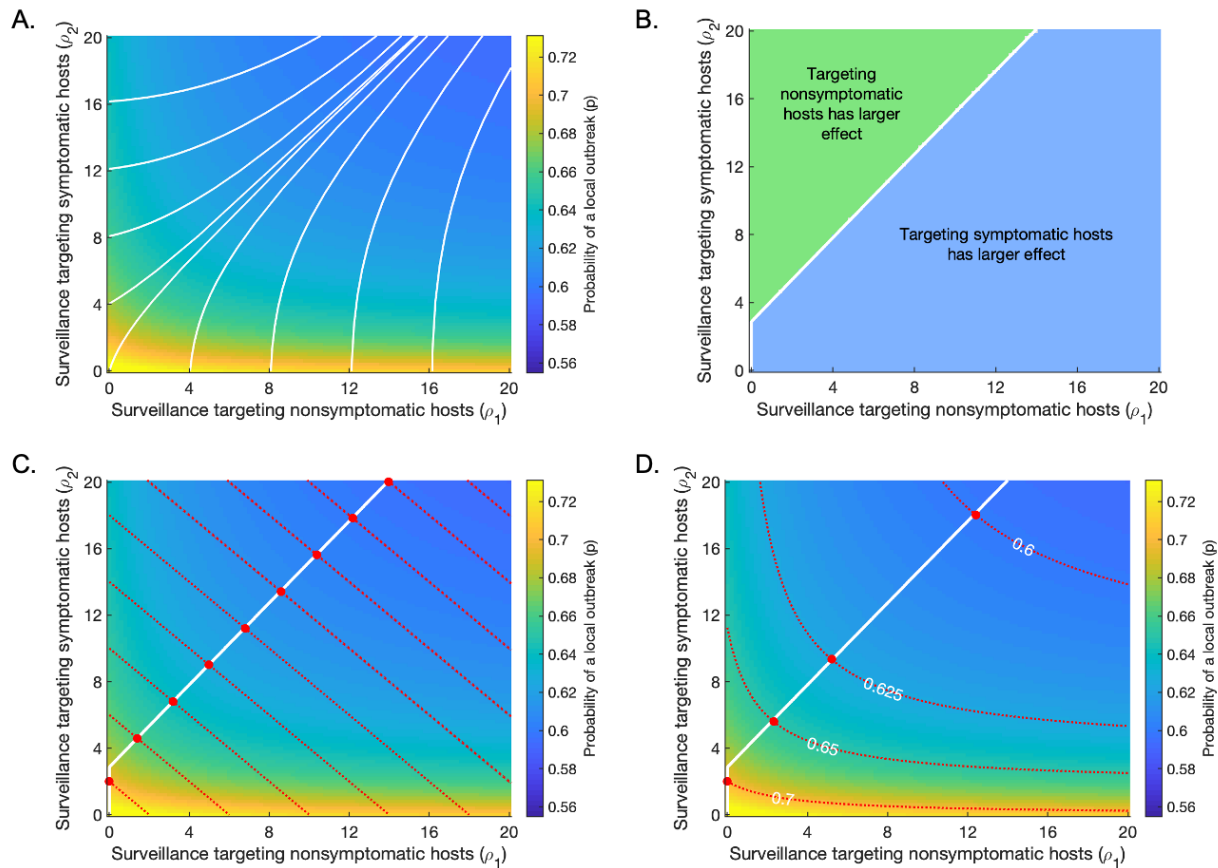

335

336

337

338

339

340

341

342

343

344

345

346

347

348

**Fig 3. Optimal surveillance strategies to reduce the probability of a local outbreak ( $p$ ) starting from a**

**single nonsymptomatic host.** A. The local outbreak probability for different values of  $\rho_1$  and  $\rho_2$ , with the

steepest descent contours overlaid (white lines). For the maximum reduction in the probability of a local

outbreak at each point, surveillance must be enhanced for both nonsymptomatic and symptomatic

individuals, with different levels of prioritisation depending on the current values of  $\rho_1$  and  $\rho_2$ . B. Values of

$\rho_1$  and  $\rho_2$  for which increasing surveillance for nonsymptomatic hosts (i.e. increasing  $\rho_1$ ) is more effective

at reducing the local outbreak probability than increasing surveillance for symptomatic hosts (i.e. increasing

$\rho_2$ ) (green region) and vice versa (blue region). The white line represents the steepest descent contour

starting from  $\rho_1 = \rho_2 = 0$ , under the constraint that surveillance can only be enhanced for either

symptomatic or nonsymptomatic hosts at any time. The diagonal section of the steepest descent contour is

made up of small horizontal and vertical sections. C. Strategies for minimising the local outbreak probability

for a given fixed total surveillance effort ( $\rho_1 + \rho_2 = C$ ). Red dotted lines indicate contours on which  $\rho_1 +$

$\rho_2$  is constant (i.e. lines on which  $\rho_1 + \rho_2$  takes the values shown); red circles indicate the points along these

349 contours at which the local outbreak probability is minimised. The white line indicates the optimal  
350 surveillance enhancement strategy if the maximum possible surveillance level (i.e. the maximum value of  
351  $\rho_1 + \rho_2 = C$ ) is increased. D. Strategies for minimising the surveillance effort required to achieve a pre-  
352 specific risk level (an “acceptable” local outbreak probability). Red dotted lines indicate contours of  
353 constant local outbreak probability (i.e. lines on which the probability of a local outbreak takes the values  
354 shown); red circles indicate the points along these contours at which the total surveillance effort  $\rho_1 + \rho_2$  is  
355 minimised. The white line indicates the optimal strategy to follow if the pre-specified risk level is increased  
356 or reduced.

357  
358 We then considered a scenario in which, at any time, it is only possible to direct resources towards  
359 enhancing surveillance of either nonsymptomatic individuals or symptomatic individuals (e.g.  
360 antigen testing of nonsymptomatic contacts of known infectious individuals, or screening for  
361 symptomatic individuals at public events). In Fig 3B, the blue region represents values of  $\rho_1$  and  
362  $\rho_2$  for which enhancing surveillance targeting symptomatic hosts (i.e. increasing  $\rho_2$ ) leads to a  
363 larger reduction in the local outbreak probability than enhancing surveillance targeting  
364 nonsymptomatic hosts (i.e. increasing  $\rho_1$ ). In contrast, in the green region, enhancing surveillance  
365 of nonsymptomatic individuals is more effective than enhancing surveillance of symptomatic  
366 individuals. The white line represents the steepest descent contour starting from  $\rho_1 = \rho_2 = 0$ ,  
367 under the constraint that surveillance can only be enhanced for symptomatic or nonsymptomatic  
368 hosts at any time.

369  
370 Practical deployment of surveillance is often subject to logistical constraints, and policy-makers  
371 may wish to design surveillance strategies to achieve a specific objective – for example, to  
372 maximise the effectiveness of limited resources or to minimise the cost of achieving a desired  
373 outcome. We therefore also considered the following two examples of such objectives.

374

375 **Objective 1: Minimise the probability of a local outbreak for a fixed total surveillance effort.**

376 First, we considered the question: given a fixed maximum surveillance effort ( $\rho_1 + \rho_2 = C$ ), how  
377 should surveillance be targeted at nonsymptomatic and symptomatic hosts? This involves setting  
378 the values of  $\rho_1$  and  $\rho_2$  to minimise the local outbreak probability. The optimal strategies in this  
379 case are shown in Fig 3C. The red dotted lines represent contours along which the total  
380 surveillance effort  $\rho_1 + \rho_2$  is held constant (i.e. different values of  $C$ ). On each contour, the red  
381 circle indicates the point at which the local outbreak probability is minimised.

382

383 If surveillance resources are increased (i.e.  $C$  increases), a further question is how surveillance  
384 should then be increased. In Fig 3C, the white line represents the contour of steepest descent,  
385 under the constraint that the total change in surveillance effort ( $\rho_1 + \rho_2$ ) is held constant at each  
386 step (rather than a constant search radius, as in Fig 3A – for more details, see Supplementary Text  
387 S2 and Supplementary Fig S2). This contour coincides exactly with that shown in Fig 3B.

388

389 These results indicate that, if surveillance resources are such that  $C$  is greater than 2.8  
390 (corresponding to a 59% reduction in time to isolation of symptomatic hosts), the optimal  
391 surveillance strategy involves both enhanced surveillance of symptomatic individuals and  
392 nonsymptomatic individuals (the red dots correspond to strictly positive values of both  $\rho_1$  and  $\rho_2$ ,  
393 unless  $C$  is less than 2.8).

394

395 **Objective 2: Minimise the total surveillance effort to achieve a pre-specified reduction in the**

396 **probability of a local outbreak.** Second, we considered the question: given a pre-specified  
397 acceptable risk level (i.e. probability of a local outbreak), how should the surveillance level

398 targeted at nonsymptomatic and symptomatic hosts be chosen? This involves choosing  $\rho_1$  and  $\rho_2$   
399 to minimise  $\rho_1 + \rho_2$  along a given contour corresponding to a fixed local outbreak probability (red  
400 dotted lines in Fig 3D). On each contour, the red circle indicates the point along that contour at  
401 which the total surveillance effort  $\rho_1 + \rho_2$  is minimised. These optimal points also lie exactly  
402 along the line on which enhancing surveillance targeted at symptomatic hosts is equally effective  
403 compared to enhancing surveillance targeted at nonsymptomatic hosts.

404

405 As long as the target local outbreak probability is less than 0.69, optimal surveillance involves  
406 enhanced surveillance of nonsymptomatic individuals as well as symptomatic individuals. For  
407 example, in order to reduce the local outbreak probability to 0.6, the optimal approach is to deploy  
408 resources such that  $\rho_1 = 12.4$  (a 74% reduction in time to isolation of nonsymptomatic  
409 individuals) and  $\rho_2 = 18.0$  (a 76% reduction in time to isolation of symptomatic individuals).

410

411 Plots analogous to Fig 3D in which the parameters were varied from their baseline values are  
412 shown in Supplementary Figs S3-12. In each case that we considered, our main finding was  
413 unchanged. There always exists a threshold local outbreak probability such that, if the target local  
414 outbreak probability is below this threshold, the optimal strategy for further reduction in the local  
415 outbreak probability involves enhancing surveillance targeting both nonsymptomatic and  
416 symptomatic individuals.

417

#### 418 **4. Discussion**

419 A key component of infectious disease epidemic management is inferring the risk of outbreaks in  
420 different locations [5-8, 11, 41, 42]. Surveillance and control strategies can be introduced to reduce  
421 the risk that imported cases will lead to local outbreaks [12, 13, 43-46]. However, for a range of

422 pathogens, public health measures are hindered by nonsymptomatic infectious hosts who can  
423 transmit the pathogen yet are challenging to detect [16, 42, 44, 47-49].

424  
425 Here, we showed how the probability of a local outbreak can be estimated using a branching  
426 process model that accounts for transmission from nonsymptomatic infected individuals (Fig 1).  
427 The model can be used to assess the local outbreak probability for different surveillance strategies  
428 that target nonsymptomatic or symptomatic hosts (Fig 2). Previous studies have shown that  
429 detection of nonsymptomatic infections can be a key component of epidemic forecasting [42] and  
430 containment [44], and have demonstrated the benefits of identifying and isolating infectious  
431 nonsymptomatic hosts to reduce transmission [16, 17]. We focused instead on investigating how  
432 surveillance should be targeted at nonsymptomatic or symptomatic hosts in order to reduce the  
433 probability that cases imported to new locations will trigger a local outbreak (Fig 3A,B). We also  
434 showed how the optimal surveillance level targeting these two groups can be assessed when  
435 surveillance resources are limited and policy-makers have specific objectives (Fig 3C,D). In each  
436 case, our main conclusion was that surveillance for nonsymptomatic infected hosts ( $\rho_1 > 0$ ) can  
437 be an important component of reducing the local outbreak risk during epidemics. This result has  
438 broad implications, and our analysis could be extended to assess the potential for containing  
439 outbreaks at their source using a range of specific interventions targeting symptomatic and  
440 nonsymptomatic hosts.

441  
442 Our goal here was to use the simplest possible model to explore the effects of surveillance of  
443 nonsymptomatic and symptomatic individuals on the risk of local outbreaks. However, this model  
444 is not without its limitations. One area of uncertainty is the precise values of the parameters  
445 governing pathogen transmission and control. In this article, we chose a baseline set of parameter

446 values that is consistent with the findings of studies conducted during the COVID-19 pandemic,  
447 although constructing a detailed transmission model for this pandemic was not our main focus. For  
448 example, we set the relative rates at which presymptomatic and asymptomatic individuals generate  
449 new infections compared to symptomatic individuals so that 48.9% of transmissions arise from  
450 presymptomatic infectors, and 10.6% arise from asymptomatic infectors [16]. While this is in line  
451 with reported estimates [50, 51], there is substantial variation between studies. Similarly, the  
452 proportion of individuals who experience a fully asymptomatic course of infection (denoted by  $\xi$   
453 in our model) is subject to a considerable degree of uncertainty. Here, we chose  $\xi = 0.2$  as the  
454 baseline value [32-34] but estimates in the literature range from 0.04 to over 0.8 [33, 52-54]. We  
455 therefore also conducted sensitivity analyses in which we explored a range of different values of  
456 model parameters (Supplementary Text S3 and Supplementary Figs S3-12). In each case that we  
457 considered, our main conclusion was unchanged: surveillance of nonsymptomatic individuals can  
458 contribute to reducing the risk of local outbreaks. This result is expected to hold for epidemics of  
459 any pathogen for which nonsymptomatic individuals contribute significantly to transmission.

460  
461 For our modelling approach to be used to make precise quantitative predictions during epidemics,  
462 it would be necessary to update the model to include the range of different specific surveillance  
463 and control interventions that are in place. For example, detection of nonsymptomatic infected  
464 individuals is facilitated by contact tracing and antigen testing, which are carried out routinely  
465 during epidemics and can be included in models explicitly [12, 44, 55, 56]. Reductions in contacts  
466 due to social distancing strategies and school or workplace closures could also be accounted for  
467 [57, 58], although such interventions are often introduced after a local outbreak has begun rather  
468 than in the initial phase of a potential local outbreak as considered here. We modelled the level of  
469 surveillance targeted at nonsymptomatic and symptomatic hosts in a simple way, using a function

470 describing the relationship between surveillance effort and effectiveness (Fig 1B). We assumed  
471 that this general functional relationship could be applied to interventions targeting both  
472 symptomatic and nonsymptomatic hosts, accounting for logistical differences in the ease of  
473 targeting either group by scaling the effectiveness of surveillance for nonsymptomatic hosts using  
474 the parameter  $\varepsilon$  (results are shown for different values of  $\varepsilon$  in Supplementary Fig S8). In principle,  
475 it would be possible to include entirely different functional forms describing the relationship  
476 between surveillance effort and effectiveness for strategies targeting symptomatic and  
477 nonsymptomatic individuals, and these could be tailored to the effects of particular interventions.  
478 If different public health measures are included in the model explicitly, then it would be possible  
479 to increase the accuracy of assessments of the relative public health benefits of specific  
480 interventions that only target symptomatic individuals (e.g. screening for passengers with  
481 heightened temperatures at airports [59, 60]) compared to interventions that also target  
482 nonsymptomatic hosts (e.g. travel bans or quarantine of all inbound passengers [61, 62]). Of  
483 course, this would require data from which the relative effectiveness of different measures could  
484 be inferred.

485  
486 The underlying transmission model could also be extended to include additional realism in several  
487 ways. Transmission dynamics are influenced by marked heterogeneities in the patterns of contacts  
488 between individuals in different age groups [63, 64], and, for COVID-19, susceptibility to  
489 infection, the likelihood of developing symptoms, and the average severity of those symptoms  
490 increase with age [65, 66]. Age-dependent variation in the proportion of asymptomatic cases in  
491 particular implies that the optimal balance of surveillance between symptomatic and  
492 nonsymptomatic hosts may differ between age groups. An age-structured version of the model  
493 presented here is a focus of our ongoing research. Similarly, for a range of infectious diseases, the



494 distribution characterising the number of secondary infections generated by each infected host (the  
495 offspring distribution) exhibits a high degree of overdispersion [67-70]. For a fixed value of  $R_0$ , a  
496 higher degree of overdispersion increases the likelihood that initial cases will fade out without  
497 leading to a local outbreak [71, 72], and suggests that greater reductions in local outbreak risks  
498 could theoretically be achieved for the same surveillance effort, if potential superspreaders or  
499 superspreading events can be identified and targeted.

500

501 Despite the necessary simplifications, we have shown how the risk of local outbreaks can be  
502 estimated during epidemics using a branching process model that includes nonsymptomatic  
503 infectious hosts explicitly. Determining the extent to which nonsymptomatic individuals contribute  
504 to transmission is essential early in emerging epidemics of a novel pathogen. As we have shown, if  
505 transmissions occur from nonsymptomatic infectors, dedicating surveillance resources towards  
506 finding nonsymptomatic cases can be an important component of public health measures that aim  
507 to prevent local outbreaks.

508

## 509 **Acknowledgements**

510 Thank you to Andrew Wood and Charles Tolkien-Gillett for proofreading.

511

## 512 **Funding**

513 FALR acknowledges funding from the Biotechnology and Biological Sciences Research Council  
514 (UKRI-BBSRC), grant number BB/M011224/1. SF and RNT acknowledge funding from the  
515 Wellcome Trust, grant number 210758/Z/18/Z. RNT also acknowledges funding from Christ  
516 Church (University of Oxford) via a Junior Research Fellowship. CAD acknowledges funding  
517 from the MRC Centre for Global Infectious Disease Analysis (reference MR/R015600/1), jointly

518 funded by the UK Medical Research Council (MRC) and the UK Foreign, Commonwealth &  
519 Development Office (FCDO) under the MRC/FCDO Concordat agreement, and is also part of the  
520 EDCTP2 programme supported by the European Union.

521

## 522 **References**

523 [1] Bloom, D.E. & Cadarette, D. 2019 Infectious Disease Threats in the Twenty-First Century:  
524 Strengthening the Global Response. *Front. Immunol.* **10**. (doi:10.3389/fimmu.2019.00549).

525 [2] Morens, D.M. & Fauci, A.S. 2013 Emerging Infectious Diseases: Threats to Human Health  
526 and Global Stability. *Public Library of Science: Pathogens* **9**, e1003467.

527 (doi:10.1371/journal.ppat.1003467).

528 [3] Sigfrid, L., Maskell, K., Bannister, P.G., Ismail, S.A., Collinson, S., Regmi, S., Blackmore, C.,  
529 Harriss, E., Longuere, K.-S., Gobat, N., et al. 2020 Addressing challenges for clinical research  
530 responses to emerging epidemics and pandemics: a scoping review. *BMC Med.* **18**, 190-190.

531 (doi:10.1186/s12916-020-01624-8).

532 [4] Thompson, R.N. & Brooks-Pollock, E. 2019 Detection, forecasting and control of infectious  
533 disease epidemics: modelling outbreaks in humans, animals and plants. *Philos. Trans. R. Soc.*

534 *Lond., B, Biol. Sci.* **374**, 20190038-20190038. (doi:10.1098/rstb.2019.0038).

535 [5] Althaus, C.L., Low, N., Musa, E.O., Shuaib, F. & Gsteiger, S. 2015 Ebola virus disease  
536 outbreak in Nigeria: Transmission dynamics and rapid control. *Epidemics* **11**, 80-84.

537 (doi:10.1016/j.epidem.2015.03.001).

538 [6] Boldog, P., Tekeli, T., Vizi, Z., Denes, A., Bartha, F.A. & Rost, G. 2020 Risk Assessment of  
539 Novel Coronavirus COVID-19 Outbreaks Outside China. *J. Clin. Med.* **9**, 571.

540 (doi:doi.org/10.3390/jcm9020571).

- 541 [7] Daon, Y., Thompson, R.N. & Obolski, U. 2020 Estimating COVID-19 outbreak risk through  
542 air travel. *J. Travel Med.* **27**. (doi:10.1093/jtm/taaa093).
- 543 [8] Lashari, A.A. & Trapman, P. 2018 Branching process approach for epidemics in dynamic  
544 partnership network. *J. Math. Biol.* **76**, 265-294. (doi:10.1007/s00285-017-1147-0).
- 545 [9] Nishiura, H., Cook, A.R. & Cowling, B.J. 2011 Assortativity and the Probability of Epidemic  
546 Extinction: A Case Study of Pandemic Influenza A (H1N1-2009). *Interdiscip. Perspect. Infect.*  
547 *Dis.* **2011**, 194507-194507. (doi:10.1155/2011/194507).
- 548 [10] Thompson, R.N., Jalava, K. & Obolski, U. 2019 Sustained transmission of Ebola in new  
549 locations: more likely than previously thought. *The Lancet Infectious Diseases* **19**, 1058-1059.  
550 (doi:10.1016/S1473-3099(19)30483-9).
- 551 [11] Thompson, R.N., Thompson, C.P., Pelerman, O., Gupta, S. & Obolski, U. 2019 Increased  
552 frequency of travel in the presence of cross-immunity may act to decrease the chance of a global  
553 pandemic. *Philos. Trans. R. Soc. Lond., B, Biol. Sci.* **374**, 20180274. (doi:10.1098/rstb.2018.0274).
- 554 [12] Hellewell, J., Abbott, S., Gimma, A., Bosse, N.I., Jarvis, C.I., Russell, T.W., Munday, J.D.,  
555 Kucharski, A.J., Edmunds, W.J., Sun, F., et al. 2020 Feasibility of controlling COVID-19  
556 outbreaks by isolation of cases and contacts. *The Lancet Global Health* **8**, e488-e496.  
557 (doi:10.1016/S2214-109X(20)30074-7).
- 558 [13] Thompson, R.N. 2020 Novel Coronavirus Outbreak in Wuhan, China, 2020: Intense  
559 Surveillance Is Vital for Preventing Sustained Transmission in New Locations. *Journal of Clinical*  
560 *Medicine* **9**, 498. (doi:10.3390/jcm9020498).
- 561 [14] Lauer, S.A., Grantz, K.H., Bi, Q., Jones, F.K., Zheng, Q., Meredith, H.R., Azman, A.S.,  
562 Reich, N.G. & Lessler, J. 2020 The Incubation Period of Coronavirus Disease 2019 (COVID-19)  
563 From Publicly Reported Confirmed Cases: Estimation and Application. *Ann. Intern. Med.* **172**,  
564 577-582. (doi:10.7326/M20-0504).

- 565 [15] McAloon, C., Collins, A., Hunt, K., Barber, A., Byrne, A.W., Butler, F., Casey, M., Griffin,  
566 J., Lane, E., McEvoy, D., et al. 2020 Incubation period of COVID-19: a rapid systematic review  
567 and meta-analysis of observational research. *BMJ Open* **10**, e039652. (doi:10.1136/bmjopen-2020-  
568 039652).
- 569 [16] Ferretti, L., Wymant, C., Kendall, M., Zhao, L., Nurtay, A., Abeler-Dorner, L., Parker, M.,  
570 Bonsall, D. & Fraser, C. 2020 Quantifying SARS-CoV-2 transmission suggests epidemic control  
571 with digital contact tracing. *Science* **368**, eabb6936. (doi:10.1126/science.abb6936).
- 572 [17] Moghadas, S.M., Fitzpatrick, M.C., Sah, P., Pandey, A., Shoukat, A., Singer, B.H. & Galvani,  
573 A. 2020 The implications of silent transmission for the control of COVID-19 outbreaks. *Proc.*  
574 *Natl. Acad. Sci. U. S. A.* **117**, 17513-17515. (doi:10.1073/pnas.2008373117).
- 575 [18] Tindale, L.C., Stockdale, J.E., Coombe, M., Garlock, E.S., Lau, W.Y.V., Saraswat, M.,  
576 Zhang, L., Chen, D., Wallinga, J. & Colijn, C. 2020 Evidence for transmission of COVID-19 prior  
577 to symptom onset. *eLife* **9**, e57149. (doi:10.7554/eLife.57149).
- 578 [19] Tong, Z.-D., Tang, A., Li, K.-F., Li, P., Wang, H.-L., Yi, J.-P., Zhang, Y.-L. & Yan, J.-B.  
579 2020 Potential Presymptomatic Transmission of SARS-CoV-2, Zhejiang Province, China, 2020.  
580 *Emerging Infectious Diseases* **26**, 1052-1054. (doi:10.3201/eid2605.200198).
- 581 [20] Wei, W.E., Li, Z., Chiew, C.J., Yong, S.E., Toh, M.P. & Lee, V.J. 2020 Presymptomatic  
582 Transmission of SARS-CoV-2 — Singapore, January 23–March 16, 2020. *Morbidity and*  
583 *Mortality Weekly Report* **69**, 411-415. (doi:10.15585/mmwr.mm6914e1external icon).
- 584 [21] Bai, Y., Yao, L., Wei, T., Tian, F., Jin, D.-Y., Chen, L. & Wang, M. 2020 Presumed  
585 Asymptomatic Carrier Transmission of COVID-19. *J. Am. Med. Assoc.* **323**, 1406-1407.  
586 (doi:10.1001/jama.2020.2565).

- 587 [22] Furukawa, N.W., Brooks, J.T. & Sobel, J. 2020 Evidence Supporting Transmission of Severe  
588 Acute Respiratory Syndrome Coronavirus 2 While Presymptomatic or Asymptomatic. *Emerging*  
589 *Infectious Diseases* **26**, e201595. (doi:10.3201/eid2607.201595).
- 590 [23] Anderson, D. & Watson, R. 1980 On the spread of a disease with gamma distributed latent  
591 and infectious periods. *Biometrika* **67**, 191-198. (doi:10.1093/biomet/67.1.191).
- 592 [24] Bartlett, M.S. 1964 The Relevance of Stochastic Models for Large-Scale Epidemiological  
593 Phenomena. *J. Roy. Stat. Soc. Ser. C. (Appl. Stat.)* **13**, 2-8. (doi:10.2307/2985217).
- 594 [25] Craft, M.E., Beyer, H.L. & Haydon, D.T. 2013 Estimating the Probability of a Major  
595 Outbreak from the Timing of Early Cases: An Indeterminate Problem? *PLoS One* **8**, e57878-  
596 e57878. (doi:10.1371/journal.pone.0057878).
- 597 [26] Lloyd, A.L., Zhang, J. & Root, A.M. 2007 Stochasticity and heterogeneity in host-vector  
598 models. *J. R. Soc. Interface* **4**, 851-863. (doi:10.1098/rsif.2007.1064).
- 599 [27] Matthews, L., Haydon, D.T., Shaw, D.J., Chase-Topping, M.E., Keeling, M.J. & Woolhouse,  
600 M.E.J. 2003 Neighbourhood control policies and the spread of infectious diseases. *Proceedings of*  
601 *the Royal Society B: Biological Sciences* **270**, 1659-1666. (doi:10.1098/rspb.2003.2429).
- 602 [28] Lai, C.-C., Shih, T.-P., Ko, W.-C., Tang, H.-J. & Hsueh, P.-R. 2020 Severe acute respiratory  
603 syndrome coronavirus 2 (SARS-CoV-2) and coronavirus disease-2019 (COVID-19): The  
604 epidemic and the challenges. *International Journal of Antimicrobial Agents* **55**, 105924.  
605 (doi:10.1016/j.ijantimicag.2020.105924).
- 606 [29] Liu, Y., Gayle, A.A., Wilder-Smith, A. & Rocklöv, J. 2020 The reproductive number of  
607 COVID-19 is higher compared to SARS coronavirus. *Journal of Travel Medicine* **27**, taaa021.  
608 (doi:10.1093/jtm/taaa021).

- 609 [30] Zhai, P., Ding, Y., Wu, X., Long, J., Zhong, Y. & Li, Y. 2020 The epidemiology, diagnosis  
610 and treatment of COVID-19. *International Journal of Antimicrobial Agents* **55**, 105955-105955.  
611 (doi:10.1016/j.ijantimicag.2020.105955).
- 612 [31] Zhao, S., Lin, Q., Ran, J., Musa, S.S., Yang, G., Wang, W., Lou, Y., Gao, D., Yang, L., He,  
613 D., et al. 2020 Preliminary estimation of the basic reproduction number of novel coronavirus  
614 (2019-nCoV) in China, from 2019 to 2020: A data-driven analysis in the early phase of the  
615 outbreak. *International Journal of Infectious Diseases* **92**, 214-217.  
616 (doi:10.1016/j.ijid.2020.01.050).
- 617 [32] Buitrago-Garcia, D., Egli-Gany, D., Counotte, M.J., Hossmann, S., Imeri, H., Ipekci, A.M.,  
618 Salanti, G. & Low, N. 2020 Occurrence and transmission potential of asymptomatic and  
619 presymptomatic SARS-CoV-2 infections: A living systematic review and meta-analysis. *PLoS*  
620 *Med.* **17**, e1003346. (doi:10.1371/journal.pmed.1003346).
- 621 [33] Byambasuren, O., Cardona, M., Bell, K., Clark, J., McLaws, M.-L. & Glasziou, P. 2020  
622 Estimating the extend of asymptomatic COVID-19 and its potential for community transmission:  
623 Systematic review and meta-analysis. *JAMMI* **5**, 223-234. (doi:10.3138/jammi-2020-0030).
- 624 [34] He, J., Guo, Y., Mao, R. & Zhang, J. 2020 Proportion of asymptomatic coronavirus disease  
625 2019: A systematic review and meta-analysis. *J. Med. Virol.* **93**, 820-830.  
626 (doi:10.1002/jmv.26326).
- 627 [35] Li, Q., Guan, X., Wu, P., Wang, X., Zhou, L., Tong, Y., Ren, R., Leung, K.S.M., Lau,  
628 E.H.Y., Wong, J.Y., et al. 2020 Early Transmission Dynamics in Wuhan, China, of Novel  
629 Coronavirus–Infected Pneumonia. *N. Engl. J. Med.* **382**, 1199-1207.  
630 (doi:10.1056/NEJMoa2001316).
- 631 [36] Arons, M.M., Hatfield, K.M., Reddy, S.C., Kimball, A., James, A., Jacobs, J.R., Taylor, J.,  
632 Spicer, K., Bardossy, A.C., Oakley, L.P., et al. 2020 Presymptomatic SARS-CoV-2 Infections and

- 633 Transmission in a Skilled Nursing Facility. *The New England Journal of Medicine* **382**, 2081-  
634 2090. (doi:10.1056/NEJMoa2008457).
- 635 [37] Bullard, J., Dust, K., Funk, D., Strong, J.E., Alexander, D., Garnett, L., Boodman, C., Bello,  
636 A., Hedley, A., Schiffman, Z., et al. 2020 Predicting Infectious Severe Acute Respiratory  
637 Syndrome Coronavirus 2 From Diagnostic Samples. *Clinical Infectious Diseases*, ciaa638.  
638 (doi:10.1093/cid/ciaa638).
- 639 [38] Wolfel, R., Corman, V.M., Guggemos, W., Seilmaier, M., Zange, S., Muller, M.A.,  
640 Niemeyer, D., Jones, T.C., Vollmar, P., Rothe, C., et al. 2020 Virological assessment of  
641 hospitalized patients with COVID-2019. *Nature* **581**, 465-469. (doi:10.1038/s41586-020-2196-x).
- 642 [39] Nasell, I. 1995 The Threshold Concept in Stochastic Epidemic and Endemic Models. In  
643 *Epidemic Models: Their Structure and Relation to Data* (ed. D. Mollison), pp. 71-83. Cambridge,  
644 UK, Cambridge University Press.
- 645 [40] Britton, T. 2010 Stochastic epidemic models: A survey. *Math. Biosci.* **225**, 24-35.  
646 (doi:10.1016/j.mbs.2010.01.006).
- 647 [41] Thompson, R.N., Gilligan, C.A. & Cunniffe, N.J. 2020 Will an outbreak exceed available  
648 resources for control? Estimating the risk from invading pathogens using practical definitions of a  
649 severe epidemic. *J. R. Soc. Interface* **17**. (doi:10.1098/rsif.2020.0690).
- 650 [42] Thompson, R.N., Gilligan, C.A. & Cunniffe, N.J. 2016 Detecting Presymptomatic Infection  
651 Is Necessary to Forecast Major Epidemics in the Earliest Stages of Infectious Disease Outbreaks.  
652 *PLoS Comput. Biol.* **12**, e1004836. (doi:10.1371/journal.pcbi.1004836).
- 653 [43] Charleston, B., Bankowski, B.M., Gubbins, S., Chase-Topping, M.E., Schley, D., Howey, R.,  
654 Barnett, P.V., Gibson, D., Juleff, N.D. & Woolhouse, M.E.J. 2011 Relationship Between Clinical  
655 Signs and Transmission of an Infectious Disease and the Implications for Control. *Science* **332**,  
656 726-729. (doi:10.1126/science.1199884).

- 657 [44] Fraser, C., Riley, S., Anderson, R.M. & Ferguson, N.M. 2004 Factors that make an infectious  
658 disease outbreak controllable. *Proc. Natl. Acad. Sci. U. S. A.* **101**, 6146-6151.  
659 (doi:10.1073/pnas.0307506101).
- 660 [45] Martinez, L. 2000 Global infectious disease surveillance. *Int. J. Infect. Dis.* **4**, 222-228.  
661 (doi:10.1016/s1201-9712(00)90114-0).
- 662 [46] Milinovich, G.J., Williams, G.M., Clements, A.C.A. & Hu, W. 2014 Internet-based  
663 surveillance systems for monitoring emerging infectious diseases. *The Lancet Infectious Diseases*  
664 **14**, 160-168. (doi:10.1016/S1473-3099(13)70244-5).
- 665 [47] Gu, Y., Komiya, N., Kamiya, H., Yasui, Y., Taniguchi, K. & Okabe, N. 2011 Pandemic  
666 (H1N1) 2009 Transmission during Presymptomatic Phase, Japan. *Emerging Infectious Diseases*  
667 **17**, 1737-1739. (doi:10.3201/eid1709.101411).
- 668 [48] Ip, D.K.M., Lau, L.L.H., Leung, N.H.L., Fang, V.J., Chan, K.-H., Chu, D.K.W., Leung,  
669 G.M., Peiris, J.S.M., Uyeki, T.M. & Cowling, B.J. 2016 Viral Shedding and Transmission  
670 Potential of Asymptomatic and Paucisymptomatic Influenza Virus Infections in the Community.  
671 *Clin. Infect. Dis.* **64**, 736-742. (doi:10.1093/cid/ciw841).
- 672 [49] ten Bosch, Q.A., Clapham, H.E., Lambrechts, L., Duong, V., Buchy, P., Althouse, B.M.,  
673 Lloyd, A.L., Waller, L.A., Morrison, A.C., Kitron, U., et al. 2018 Contributions from the silent  
674 majority dominate dengue virus transmission. *PLoS Pathog.* **14**, e1006965-e1006965.  
675 (doi:10.1371/journal.ppat.1006965).
- 676 [50] He, X., Lau, E.H.Y., Wu, P., Deng, X., Wang, J., Hao, X., Lau, Y.C., Wong, J.Y., Guan, Y.,  
677 Tan, X., et al. 2020 Temporal dynamics in viral shedding and transmissibility of COVID-19. *Nat.*  
678 *Med.* **26**, 672-675. (doi:10.1038/s41591-020-0869-5).



- 679 [51] Ren, X., Li, Y., Yang, X., Li, Z., Cui, J., Zhu, A., Zhao, H., Yu, J., Nie, T., Ren, M., et al.  
680 2020 Evidence for pre-symptomatic transmission of coronavirus disease 2019 (COVID-19) in  
681 China. *Influenza Other Respi. Viruses*, 1-9. (doi:10.1111/irv.12787).
- 682 [52] Yanes-Lane, M., Winters, N., Fregonese, F., Bastos, M., Perlman-Arrow, S., Campbell, J.R.  
683 & Menzies, D. 2020 Proportion of asymptomatic infection among COVID-19 positive persons and  
684 their transmission potential: A systematic review and meta-analysis. *PLoS One* **15**.  
685 (doi:10.1371/journal.pone.0241536).
- 686 [53] Meyerowitz, E.A., Richterman, A., Bogoch, I.I., Low, N. & Cevik, M. 2020 Towards an  
687 accurate and systematic characterisation of persistently asymptomatic infection with SARS-CoV-  
688 2. *The Lancet Infectious Diseases*. (doi:10.1016/S1473-3099(20)30837-9).
- 689 [54] Oran, D.P. & Topol, E.J. 2020 Prevalence of Asymptomatic SARS-CoV-2 Infection: A  
690 Narrative Review. *Ann. Intern. Med.* **173**, 362-367. (doi:10.7326/M20-3012 ).
- 691 [55] Klinkenberg, D., Fraser, C. & Heesterbeek, H. 2006 The Effectiveness of Contact Tracing in  
692 Emerging Epidemics. *PLoS One* **1**, e12-e12. (doi:10.1371/journal.pone.0000012).
- 693 [56] Webb, G., Browne, C., Huo, X., Seydi, O., Seydi, M. & Magal, P. 2015 A Model of the 2014  
694 Ebola Epidemic in West Africa with Contact Tracing. *PLoS Curr.* **7**.  
695 (doi:10.1371/currents.outbreaks.846b2a31ef37018b7d1126a9c8adf22a).
- 696 [57] Davies, N.G., Kucharski, A.J., Eggo, R.M., Gimma, A., Edmunds, W.J., Jombart, T.,  
697 O'Reilly, K., Endo, A., Hellewell, J., Nightingale, E.S., et al. 2020 Effects of non-pharmaceutical  
698 interventions on COVID-19 cases, deaths, and demand for hospital services in the UK: a  
699 modelling study. *The Lancet Public Health* **5**, E375-E385. (doi:10.1016/S2468-2667(20)30133-  
700 X).
- 701 [58] Thompson, R.N. 2020 Epidemiological models are important tools for guiding COVID-19  
702 interventions. *BMC Med.* **18**. (doi:10.1186/s12916-020-01628-4).

- 703 [59] Nishiura, H. & Kamiya, K. 2011 Fever screening during the influenza (H1N1-2009)  
704 pandemic at Narita International Airport, Japan. *BMC Infect. Dis.* **11**, 111-111. (doi:10.1186/1471-  
705 2334-11-111).
- 706 [60] Quilty, B.J., Clifford, S., group, C.n.w., Flasche, S. & Eggo, R.M. 2020 Effectiveness of  
707 airport screening at detecting travellers infected with novel coronavirus (2019-nCoV).  
708 *Eurosurveillance* **25**, 2000080-2000080. (doi:10.2807/1560-7917.ES.2020.25.5.2000080).
- 709 [61] Chinazzi, M., Davis, J.T., Ajelli, M., Gioannini, C., Litvinova, M., Merler, S., y Piontti, A.P.,  
710 Mu, K., Rossi, L., Sun, K., et al. 2020 The effect of travel restrictions on the spread of the 2019  
711 novel coronavirus (COVID-19) outbreak. *Science* **368**, 395-400. (doi:10.1126/science.aba9757).
- 712 [62] Dickens, B.L., Koo, J.R., Lim, J.T., Sun, H., Clapham, H.E., Wilder-Smith, A. & Cook, A.R.  
713 2020 Strategies at points of entry to reduce importation risk of COVID-19 cases and reopen travel.  
714 *J. Travel Med.*, taaa141-taaa141. (doi:10.1093/jtm/taaa141).
- 715 [63] Prem, K., Cook, A.R. & Jit, M. 2017 Projecting social contact matrices in 152 countries using  
716 contact surveys and demographic data. *PLOS Computational Biology* **13**, e1005697.  
717 (doi:10.1371/journal.pcbi.1005697).
- 718 [64] Zhang, J., Litvinova, M., Liang, Y., Wang, Y., Wang, W., Zhao, S., Wu, Q., Merler, S.,  
719 Viboud, C., Vespignani, A., et al. 2020 Changes in contact patterns shape the dynamics of the  
720 COVID-19 outbreak in China. *Science* **368**, 1481-1486. (doi:10.1126/science.abb8001).
- 721 [65] Kang, S.-J. & Jung, S.I. 2020 Age-Related Morbidity and Mortality among Patients with  
722 COVID-19. *J. Infect. Chemother.* **52**, 154-164. (doi:10.3947/ic.2020.52.2.154).
- 723 [66] Davies, N.G., Klepac, P., Liu, Y., Prem, K., Jit, M., Pearson, C.A.B., Quilty, B.J., Kucharski,  
724 A.J., Gibbs, H., Clifford, S., et al. 2020 Age-dependent effects in the transmission and control of  
725 COVID-19 epidemics. *Nature Medicine* **26**, 1205-1211. (doi:10.1038/s41591-020-0962-9).

- 726 [67] Endo, A., Centre for the Mathematical Modelling of Infectious Diseases COVID-19 Working  
727 Group, Abbott, S., Kucharski, A. & Funk, S. 2020 Estimating the overdispersion in COVID-19  
728 transmission using outbreak sizes outside China [version 3; peer review: 2 approved]. *Wellcome*  
729 *Open Research* **5**. (doi:10.12688/wellcomeopenres.15842.3).
- 730 [68] Lau, M.S.Y., Grenfell, B., Thomas, M., Bryan, M., Nelson, K. & Lopman, B. 2020  
731 Characterizing superspreading events and age-specific infectiousness of SARS-CoV-2  
732 transmission in Georgia, USA. *Proc. Natl. Acad. Sci. U. S. A.* **117**, 22430-22435.  
733 (doi:10.1073/pnas.2011802117).
- 734 [69] Woolhouse, M.E.J., Dye, C., Etard, J.-F., Smith, T., Charlwood, J.D., Garnett, G.P., Hagan,  
735 P., Hii, J.L.K., Ndhlovu, P.D., Quinnell, R.J., et al. 1997 Heterogeneities in the transmission of  
736 infectious agents: Implications for the design of control programs. *Proceedings of the National*  
737 *Academy of Sciences* **94**, 338-342. (doi:10.1073/pnas.94.1.338).
- 738 [70] Thompson, R.N., Hollingsworth, T.D., Isham, V., Arribas-Bel, D., Ashby, B., Britton, T.,  
739 Challenor, P., Chappell, L.H.K., Clapham, H., Cunniffe, N.J., et al. 2020 Key questions for  
740 modelling COVID-19 exit strategies. *Proceedings of the Royal Society B: Biological Sciences* **287**,  
741 20201405. (doi:10.1098/rspb.2020.1405).
- 742 [71] Lloyd-Smith, J.O., Schreiber, S.J., Kopp, P.E. & Getz, W.M. 2005 Superspreading and the  
743 effect of individual variation on disease emergence. *Nature* **438**, 355-359.  
744 (doi:10.1038/nature04153).
- 745 [72] Lipsitch, M., Cohen, T., Cooper, B., Robins, J.M., Ma, S., James, L., Gopalakrishna, G.,  
746 Chew, S.K., Tan, C.C., Samore, M.H., et al. 2003 Transmission Dynamics and Control of Severe  
747 Acute Respiratory Syndrome. *Science* **300**, 1966-1970. (doi:10.1126/science.1086616).
- 748 [73] Norris, J.R. 1997 *Markov Chains (Cambridge Series in Statistical and Probabilistic*  
749 *Mathematics)*. Cambridge, Cambridge University Press.

750

## 751 **Supplementary Text**

752

### 753 **Text S1. Probability of a local outbreak**

754 In the Methods section of the main text, we outlined an approach for deriving the probability of a local outbreak  
755 starting from a single infectious host in either the presymptomatic, symptomatic or asymptomatic classes. Here,  
756 we provide more details about that derivation. The probability of a local outbreak not occurring, starting from  $i$   
757 presymptomatic hosts,  $j$  symptomatic hosts and  $k$  asymptomatic hosts, is denoted by  $q_{i,j,k}$ . If we consider the  
758 temporal evolution of  $(i, j, k)$  to be a Markov process on the state space  $M = \mathbb{Z}_{\geq 0} \times \mathbb{Z}_{\geq 0} \times \mathbb{Z}_{\geq 0}$ , then  $q_{i,j,k}$  is the  
759 hitting probability of the state  $(0,0,0)$  starting from the state  $(i, j, k)$ . The vector of hitting probabilities  $q^* =$   
760  $\{q_{i,j,k}^* \mid (i, j, k) \in M\}$  is therefore the minimal non-negative (real) solution to the following system of equations:

$$761 \quad q_{0,0,0} = 1,$$

$$762 \quad q_{i,j,k} = \sum_{(l,m,n) \in M} p_{(i,j,k),(l,m,n)} q_{l,m,n} \text{ for } (i, j, k) \neq (0,0,0),$$

763 where  $p_{(i,j,k),(l,m,n)}$  is the transition probability from state  $(i, j, k)$  to state  $(l, m, n)$  [73].

764 Here, minimality means that if  $\hat{q} = \{\hat{q}_{i,j,k} \mid (i, j, k) \in M\}$  is another non-negative real solution, then  $q_{i,j,k}^* \leq$   
765  $\hat{q}_{i,j,k}$  for all  $(i, j, k) \in M$ .

766

767 From this, equations (3), (4) and (5) in the main text are obtained. These equations may be reduced to the  
768 following quartic equation for  $q_{0,0,1}$ :

$$769 \quad \omega_4 q_{0,0,1}^4 + \omega_3 q_{0,0,1}^3 + \omega_2 q_{0,0,1}^2 + \omega_1 q_{0,0,1} + \omega_0 = 0,$$

770 where

$$771 \quad \omega_4 = d(a-d)(d-c)\xi;$$

$$772 \quad \omega_3 = cd(a-d)(1-d)\xi - bd^3(1-c)(1-\xi) + (d-c)[d-a-ad\xi + d^2(a-1+b(1-\xi)+\xi)];$$

$$773 \quad \omega_2 = c(1-d)[d-a-ad\xi + d^2(a-1+b(1-\xi)+\xi)] + (d-c)[d(d-2a-1)+2a];$$

$$774 \quad \omega_1 = c(1-d)[d(d-2a-1)+2a] - a(1-d)^2(d-c);$$

$$775 \quad \omega_0 = -ac(1-d)^3.$$

776 The parameters  $a, b, c, d$  and  $\xi$  are as defined in the main text.

777

778 This yields four solutions for  $q_{0,0,1}$  and four corresponding solutions for each of  $q_{1,0,0}$  and  $q_{0,1,0}$ . One solution is  
779 always given by  $q_{1,0,0} = q_{0,1,0} = q_{0,0,1} = 1$ ; the other solutions may be found numerically. As described above,  
780 we take the minimal non-negative real solution  $q_{1,0,0} = q_{1,0,0}^*$ ,  $q_{0,1,0} = q_{0,1,0}^*$ ,  $q_{0,0,1} = q_{0,0,1}^*$ , and observe that the  
781 probability of a local outbreak occurring starting from  $i$  presymptomatic hosts,  $j$  symptomatic hosts and  $k$   
782 asymptomatic hosts is simply  $1 - q_{i,j,k}$ , giving the result stated in the main text.

783

784 If required, this result can be confirmed for specific model parameter values via repeated stochastic simulation of  
785 the branching process model, starting from  $i$  presymptomatic hosts,  $j$  symptomatic hosts and  $k$  asymptomatic  
786 hosts. As described in the main text, in simulations of branching process models, initial cases typically either  
787 fade out or go on to cause a local outbreak. There is a natural definition of a local outbreak as a simulation in  
788 which a large number of infections occur (see Supplementary Fig S1B). The probability of a local outbreak then  
789 corresponds to the proportion of simulations in which large numbers of infections occur.

790

791 We note here that although this is a natural way to define a local outbreak, alternative definitions exist that may  
792 be more appropriate in particular contexts. This is discussed by Thompson *et al.* (reference [41] in the main  
793 text), who consider three practically relevant definitions of an outbreak based on different criteria for measuring  
794 severity.

795

## 796 **Text S2. Computation of steepest descent contours**

797 The steepest descent contours shown in Fig 3A of the main text were computed using a gradient maximisation  
798 approach, in which at each point the contour direction was determined by minimising the local outbreak  
799 probability over a fixed search radius (Fig S2 A,B). Starting from  $\rho_1, \rho_2$ , at each step we considered increasing  
800  $\rho_1$  by an amount  $\Delta\rho_1$  and increasing  $\rho_2$  by an amount  $\Delta\rho_2$  subject to the constraint  $(\Delta\rho_1)^2 + (\Delta\rho_2)^2 = r^2$ ,  
801 where  $r$  is a small pre-specified constant. To achieve this, we scanned over the circular arc  $\Delta\rho_1 =$   
802  $r \cos \theta, \Delta\rho_2 = r \sin \theta$ , for  $\theta \in [0, \pi/2]$  (Fig S2 A). In practice, this range was discretised into 33 search

803 directions evenly spaced between 0 and  $\pi/2$ . We then selected the pair of  $\Delta\rho_1, \Delta\rho_2$  values for which the local  
804 outbreak probability evaluated at  $\rho_1 + \Delta\rho_1, \rho_2 + \Delta\rho_2$  was minimised. The process was then repeated beginning  
805 from  $\rho_{1_{new}} = \rho_1 + \Delta\rho_1, \rho_{2_{new}} = \rho_2 + \Delta\rho_2$  (Fig S2 B). The white line in Fig 3B, which divides the region in  
806 which increasing  $\rho_1$  has a greater effect on the local outbreak probability from the region in which increasing  $\rho_2$   
807 has a greater effect on the local outbreak probability, was computed in an analogous way, with the additional  
808 restriction that we only considered the search directions  $\theta = 0$  and  $\theta = \pi/2$  (i.e. intensifying only surveillance  
809 of nonsymptomatic or symptomatic hosts; see Fig S2 C).

810  
811 In Fig 3C, the white line represents the contour of steepest descent under the constraint that the total change in  
812 surveillance effort ( $\Delta\rho_1 + \Delta\rho_2 = S$ ) is held constant at each step, rather than fixing the search radius  $(\Delta\rho_1)^2 +$   
813  $(\Delta\rho_2)^2 = r^2$  as in Fig 3A. Therefore, instead of scanning over a circular arc, at each step we scan along the line  
814  $\Delta\rho_1 = s, \Delta\rho_2 = S - s$ , where  $s$  varies in the range  $[0, S]$  (Fig S2 D). Otherwise, the process is completely  
815 analogous to that described above.

816

### 817 **Text S3. Robustness of results to parameter values used**

818 We conducted supplementary analyses to investigate how our results are affected by varying the parameters  
819 from their baseline values given in Table 1. We performed sensitivity analyses on the values of  $R_0, \xi, K_p, K_a, \gamma +$   
820  $\mu, \epsilon, \lambda, \nu$  and  $\delta$ . For each of these, we present plots analogous to Fig 3D for six different values of the relevant  
821 parameter (Figs S3-S12). In each case we considered, our qualitative message was unchanged: whenever the  
822 maximum acceptable risk level was below a particular threshold value, the optimal strategy involved  
823 surveillance targeting both nonsymptomatic and symptomatic individuals.

824

### 825 **Text S4. Details on computer code**

826 All computer code was written in the MATLAB programming environment (version R2019a).

827

828

829

## 830 Supplementary Figures

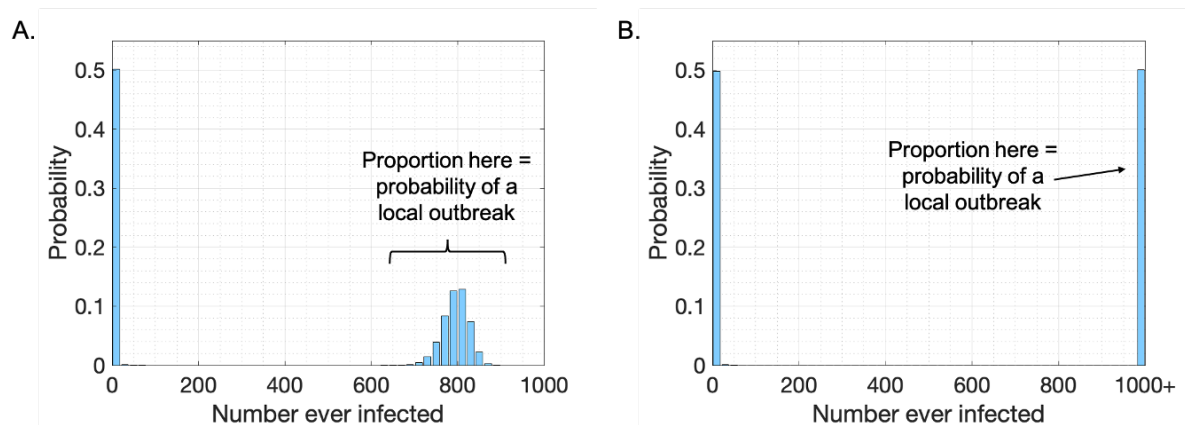

831

832 **Fig S1. Illustrating the definition of the term ‘local outbreak’ with a simple example.** A. The total number

833 of individuals ever infected (final epidemic size) in each of 100,000 simulations of a stochastic SIR (Susceptible-

834 Infected-Removed) model with basic reproduction number  $R_0 = 2$ , beginning from a single infectious host each

835 time. Within each simulation, each event is either an infection event (with probability  $\frac{R_0 S}{R_0 S + N}$ ) or a removal event

836 (with probability  $\frac{N}{R_0 S + N}$ ), and simulations are run until the pathogen fades out ( $I$  hits zero). This provides a

837 natural partitioning between simulations that fade out quickly and those that go on to become local outbreaks. In

838 50% of simulations, fewer than 20 infections occurred in total (left hand peak); initial cases did not lead to

839 sustained transmission in the population. In the remaining 50% of simulations (local outbreaks), between 620

840 and 900 individuals were infected in total each time. The probability of a local outbreak is then defined as the

841 proportion of simulations for which the final epidemic size lies within this natural upper range, here equal to 0.5.

842 B. The analogous figure to panel A, but for the branching process version of the SIR model in which depletion of

843 susceptibles is not accounted for (i.e.  $S = N$  throughout each simulation). In this model, each event is either an

844 infection event (with probability  $\frac{R_0}{R_0 + 1}$ ) or a removal event (with probability  $\frac{1}{R_0 + 1}$ ), and simulations are run until

845 either the pathogen fades out ( $I$  hits zero) or 1000 infections have occurred. The rightmost bar corresponds to

846 simulations in which 1000 infections occurred. There is again a natural partitioning between simulations that

847 fade out quickly and those that go on to become local outbreaks, with the probability of a local outbreak

848 matching the equivalent value for the stochastic SIR model (panel A).

849

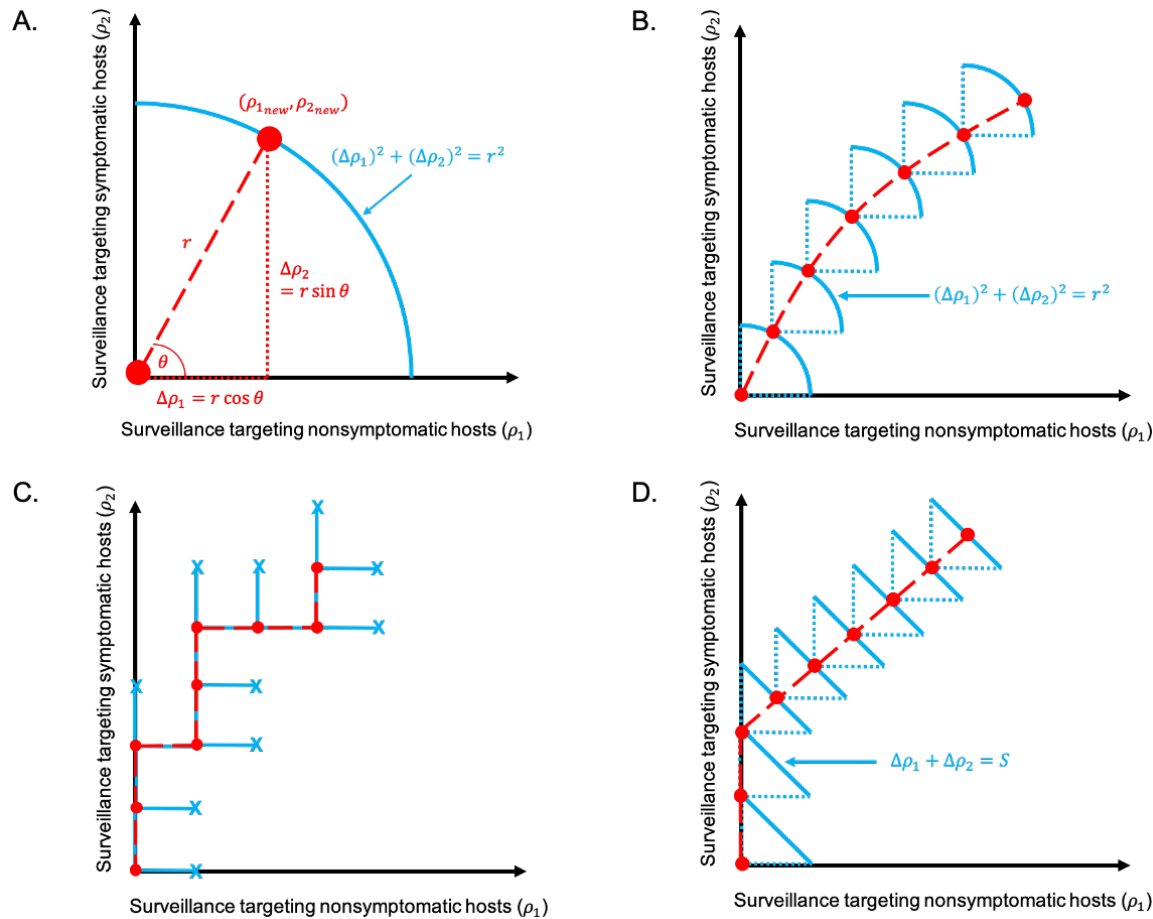

850

851 **Fig S2. Computation of the steepest descent contours shown in the main text.** A. To compute the steepest  
 852 descent contours shown in Fig 3A of the main text, we increment  $\rho_1$  and  $\rho_2$  by scanning over a constant search  
 853 radius  $(\Delta\rho_1)^2 + (\Delta\rho_2)^2 = r^2$  (blue arc), and moving to the point  $(\rho_{1_{new}}, \rho_{2_{new}})$  along that arc at which the local  
 854 outbreak probability is minimised. B. The process shown in A is repeated to generate the complete contour (red  
 855 dashed line). C. The analogous figure to B, in which the search direction is limited to directly to the right ( $\theta =$   
 856  $0$ ) or directly upwards ( $\theta = \pi/2$ ). This procedure is used to generate the contour in Fig 3B in the main text. D.  
 857 The analogous figure to B, in which the total change in surveillance effort ( $\Delta\rho_1 + \Delta\rho_2 = S$ ) is held constant at  
 858 each step, rather than the search radius. This procedure is used to generate the contour in Figs 3C and D in the  
 859 main text.

860

861



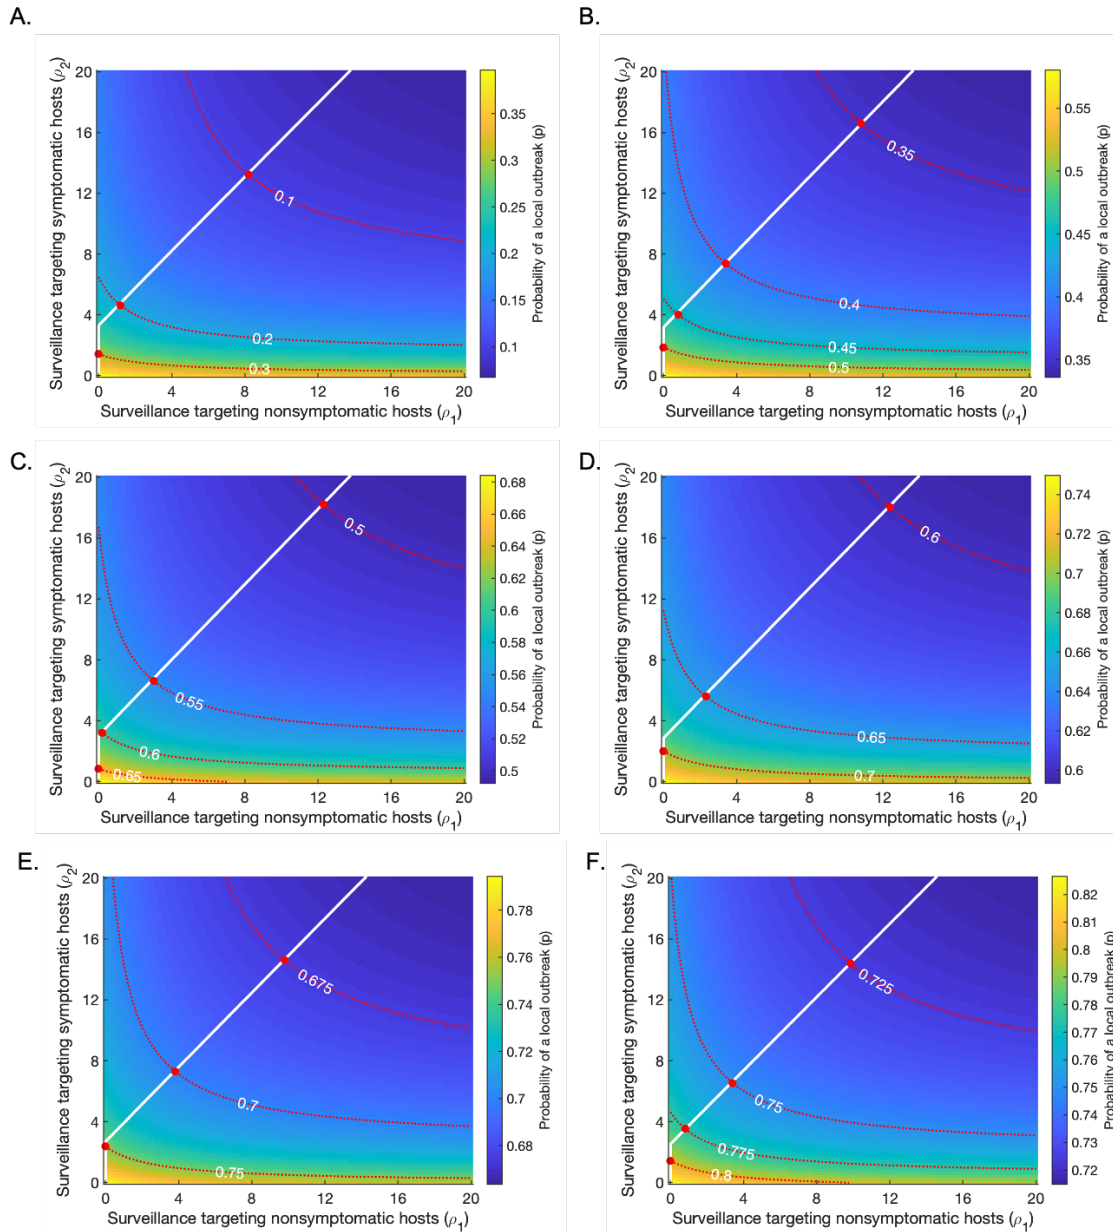

862

863 **Fig S3. Varying the basic reproduction number  $R_0$  from its baseline value ( $R_0 = 3$ ).** Plots are analogous to

864 Fig 3D in the main text, showing strategies for minimising the surveillance effort required to achieve a pre-

865 specified risk level (an “acceptable” local outbreak probability). Red dotted lines represent contours along which

866 the probability of a local outbreak is constant, as labelled; red circles indicate the points along these contours at

867 which the total surveillance effort  $\rho_1 + \rho_2$  is minimised. The white line indicates the optimal strategy to follow if

868 the pre-specified risk level is reduced. Apart from  $R_0$  and  $\beta$  (which is changed in each panel to set the value of

869  $R_0$ ), all parameters are held fixed at their baseline values given in Table 1. A.  $R_0 = 1.5$ . B.  $R_0 = 2$ . C.  $R_0 = 2.5$ .

870 D.  $R_0 = 3$  (baseline). E.  $R_0 = 3.5$ . F.  $R_0 = 4$ .

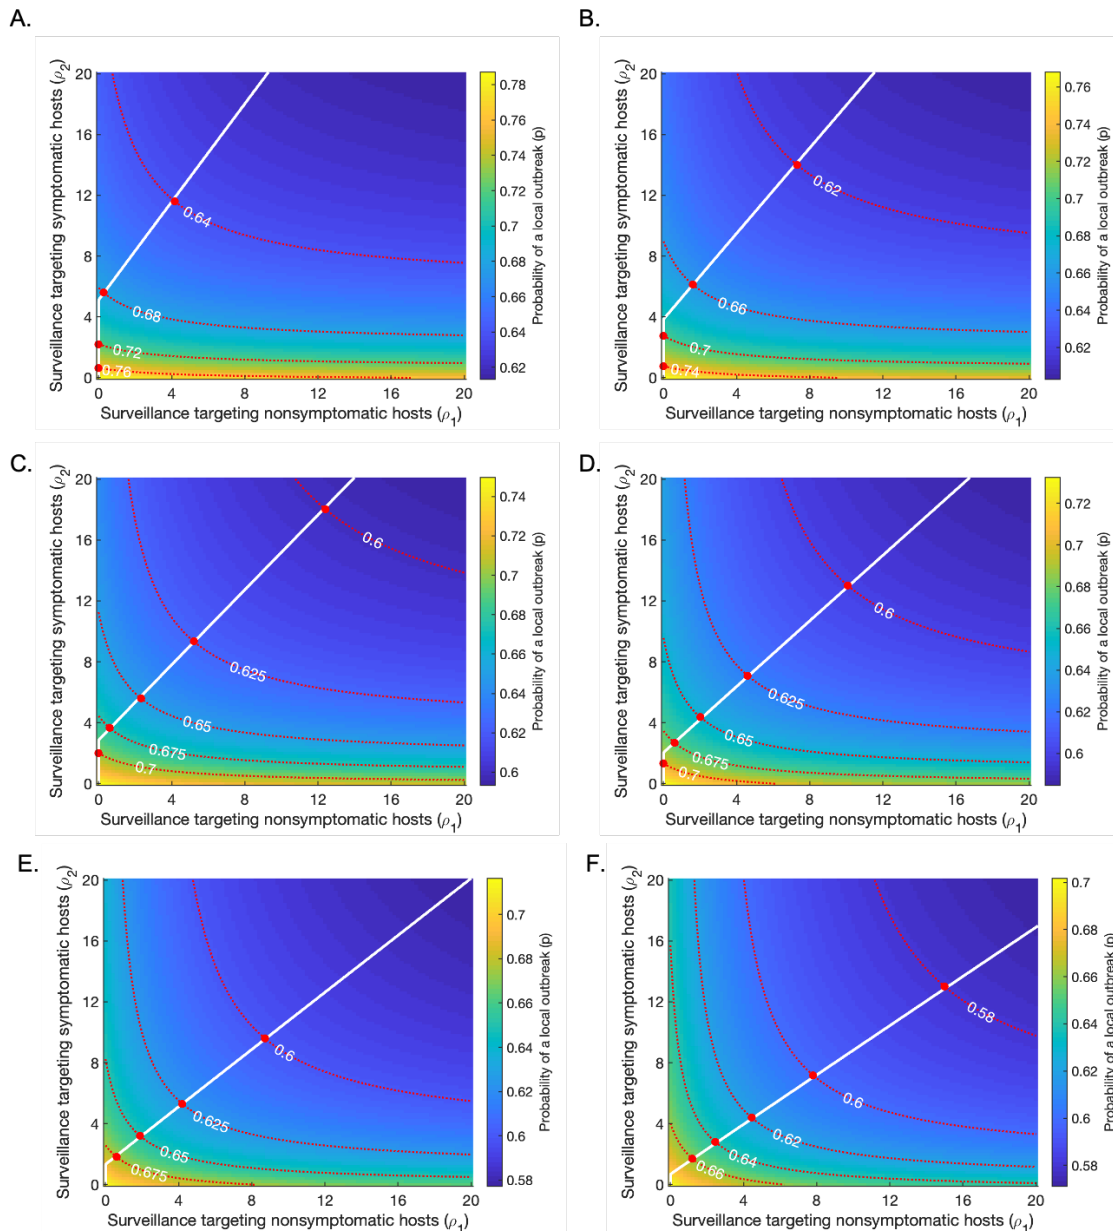

871

872 **Fig S4. Varying the proportion of infections from asymptomatic infectors,  $\xi$ , from its baseline value ( $\xi =$**

873 **0.2).** Plots are analogous to Fig 3D in the main text, showing strategies for minimising the surveillance effort

874 required to achieve a pre-specified risk level (an “acceptable” local outbreak probability). Red dotted lines

875 represent contours along which the probability of a local outbreak is constant, as labelled; red circles indicate the

876 points along these contours at which the total surveillance effort  $\rho_1 + \rho_2$  is minimised. The white line indicates

877 the optimal strategy to follow if the pre-specified risk level is reduced. Apart from  $\xi$  and  $\beta$  (which is changed in

878 each panel to set  $R_0 = 3$ ), all parameters are held fixed at their baseline values given in Table 1. A.  $\xi = 0$ . B.

879  $\xi = 0.1$ . C.  $\xi = 0.2$  (baseline). D.  $\xi = 0.3$ . E.  $\xi = 0.4$ . F.  $\xi = 0.5$ .

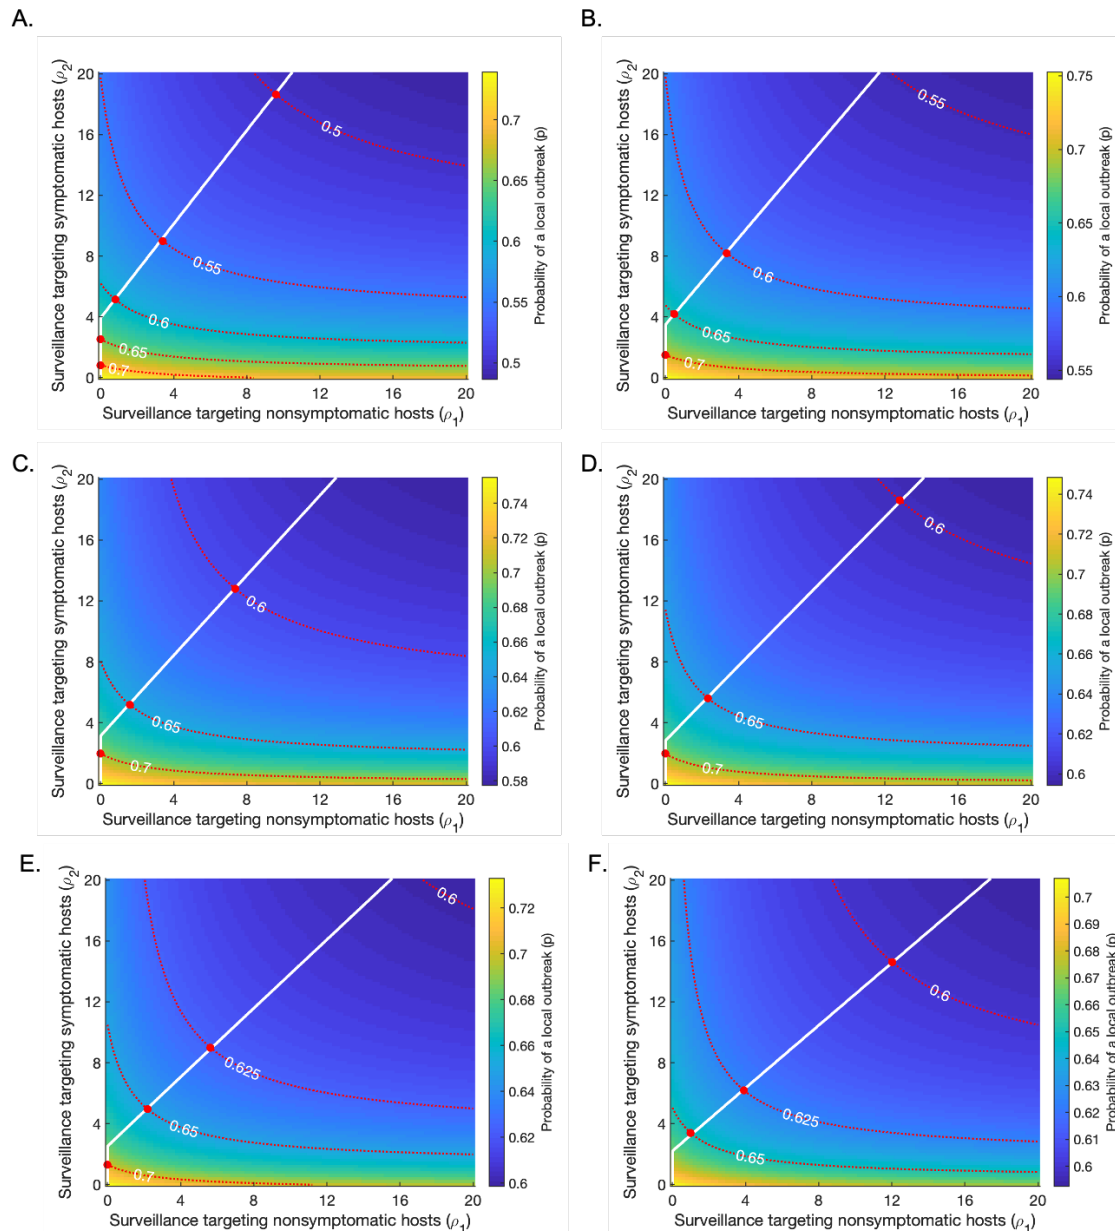

880

881 **Fig S5. Varying the proportion of infections arising from presymptomatic hosts in the absence of**  
 882 **intensified surveillance ( $K_p$ , given by expression (1) in the main text) from its baseline value ( $K_p =$**   
 883 **0.489).** In each case, the proportions of infections arising from asymptomatic and symptomatic hosts are  
 884 adjusted so that they remain in the same ratio as in the baseline case. Plots are analogous to Fig 3D in the main  
 885 text, showing strategies for minimising the surveillance effort required to achieve a pre-specified risk level (an  
 886 “acceptable” local outbreak probability). Red dotted lines represent contours along which the probability of a  
 887 local outbreak is constant, as labelled; red circles indicate the points along these contours at which the total  
 888 surveillance effort  $\rho_1 + \rho_2$  is minimised. The white line indicates the optimal strategy to follow if the pre-

889 specified risk level is reduced. Apart from  $K_p$  and  $K_a$ , as well as  $\alpha$  and  $\eta$  (which are changed in each panel to set  
 890 the values of  $K_p$  and  $K_a$ ), and  $\beta$  (which is changed in each panel to set  $R_0 = 3$ ), all parameters are held fixed at  
 891 their baseline values given in Table 1. A.  $K_p = 0.2$ . B.  $K_p = 0.3$ . C.  $K_p = 0.4$ . D.  $K_p = 0.5$ . E.  $K_p = 0.6$ . F.  
 892  $K_p = 0.7$ .  
 893

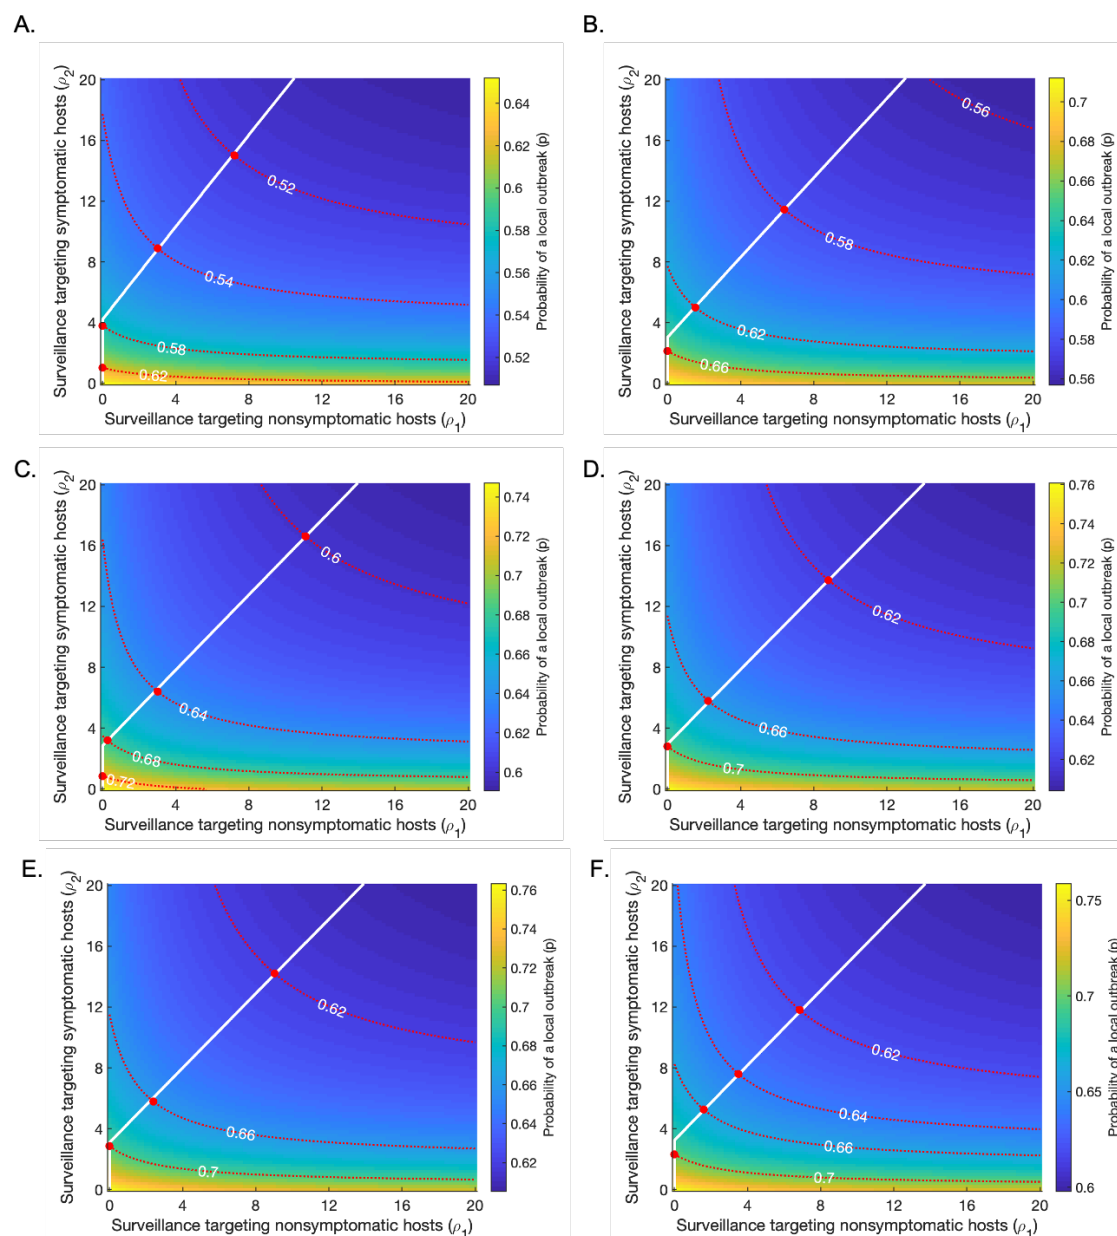

894  
 895 **Fig S6. Varying the proportion of infections arising from asymptomatic hosts in the absence of intensified**  
 896 **surveillance ( $K_a$ , given by expression (2) in the main text) from its baseline value ( $K_a = 0.106$ ). In each**

897 case, the proportions of infections arising from presymptomatic and symptomatic hosts are adjusted so that they  
898 remain in the same ratio as in the baseline case. Plots are analogous to Fig 3D in the main text, showing  
899 strategies for minimising the surveillance effort required to achieve a pre-specified risk level (an “acceptable”  
900 local outbreak probability). Red dotted lines represent contours along which the probability of a local outbreak is  
901 constant, as labelled; red circles indicate the points along these contours at which the total surveillance effort  
902  $\rho_1 + \rho_2$  is minimised. The white line indicates the optimal strategy to follow if the pre-specified risk level is  
903 reduced. Apart from  $K_p$  and  $K_a$ , as well as  $\alpha$  and  $\eta$  (which are changed in each panel to set the values of  $K_p$  and  
904  $K_a$ ), and  $\beta$  (which is changed in each panel to set  $R_0 = 3$ ), all parameters are held fixed at their baseline values  
905 given in Table 1. A.  $K_a = 0.01$ . B.  $K_a = 0.05$ . C.  $K_a = 0.1$ . D.  $K_a = 0.15$ . E.  $K_a = 0.2$ . F.  $K_a = 0.25$ .  
906

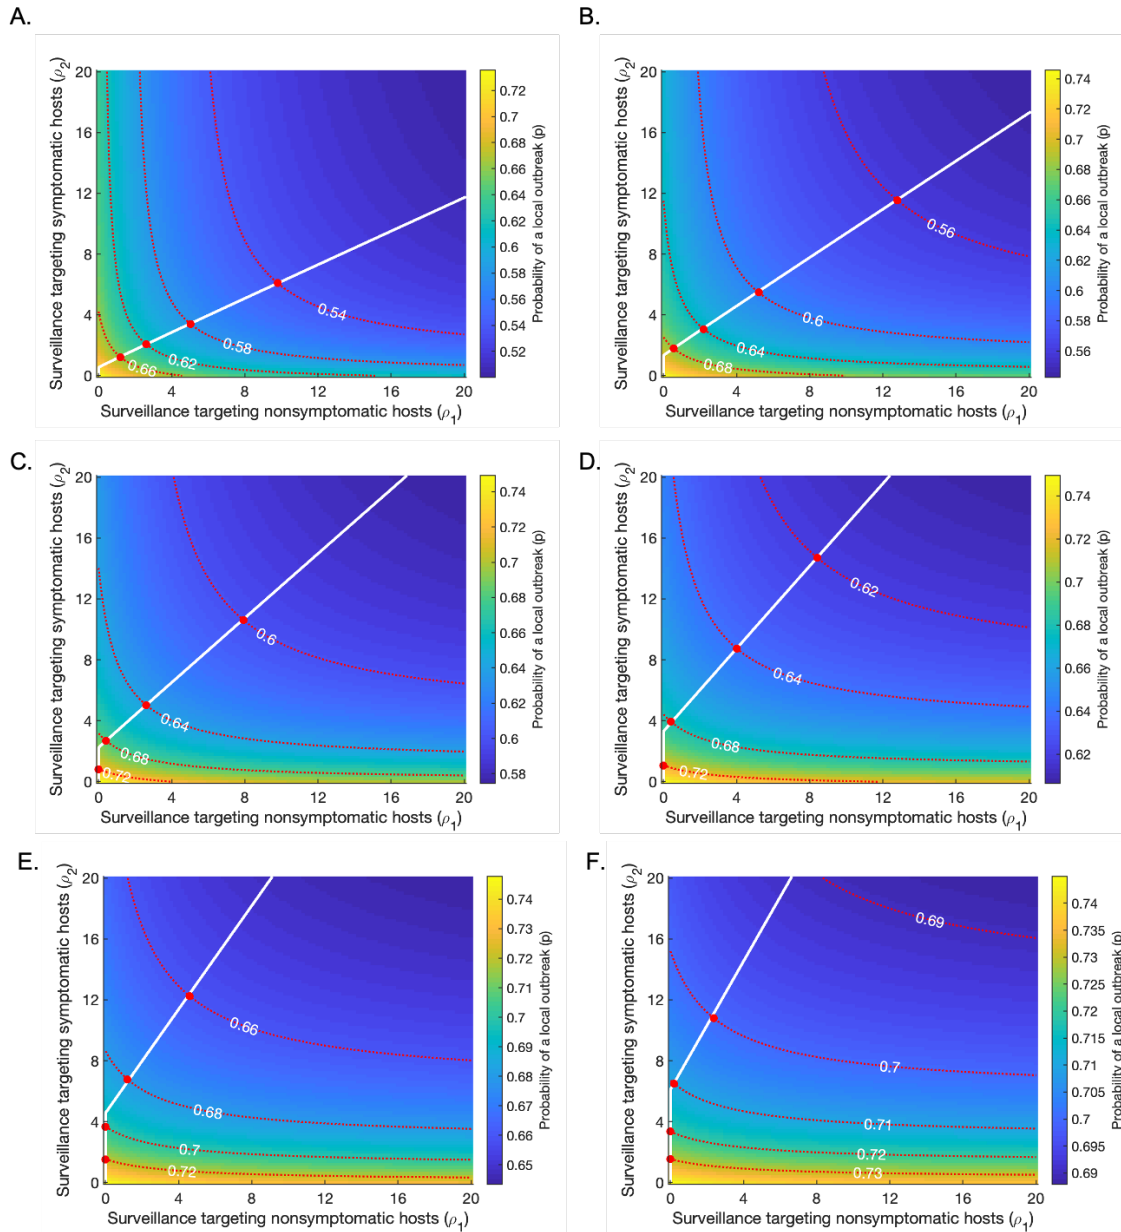

907

908 **Fig S7. Varying the expected time period to isolation conditional on isolation occurring during the**  
 909 **symptomatic period,  $1/(\gamma + \mu)$ , from its baseline value ( $1/(\gamma + \mu) = 4.6$  days). This is achieved by**  
 910 **varying the parameter  $\gamma$ , whilst holding the recovery rate of symptomatic individuals  $\mu$  equal to its baseline**  
 911 **value ( $\mu = 1/8 \text{ days}^{-1}$ ). Plots are analogous to Fig 3D in the main text, showing strategies for minimising the**  
 912 **surveillance effort required to achieve a pre-specified risk level (an “acceptable” local outbreak probability). Red**  
 913 **dotted lines represent contours along which the probability of a local outbreak is constant, as labelled; red circles**  
 914 **indicate the points along these contours at which the total surveillance effort  $\rho_1 + \rho_2$  is minimised. The white**  
 915 **line indicates the optimal strategy to follow if the pre-specified risk level is reduced. Apart from  $\gamma$  and  $\beta$  (which**

916 is changed in each panel to set  $R_0 = 3$ ), all parameters are held fixed at their baseline values given in Table 1. A.  
 917  $1/(\gamma + \mu) = 2$  days. B.  $1/(\gamma + \mu) = 3$  days. C.  $1/(\gamma + \mu) = 4$  days. D.  $1/(\gamma + \mu) = 5$  days. E.  $1/(\gamma + \mu) = 6$   
 918 days. F.  $1/(\gamma + \mu) = 7$  days.  
 919

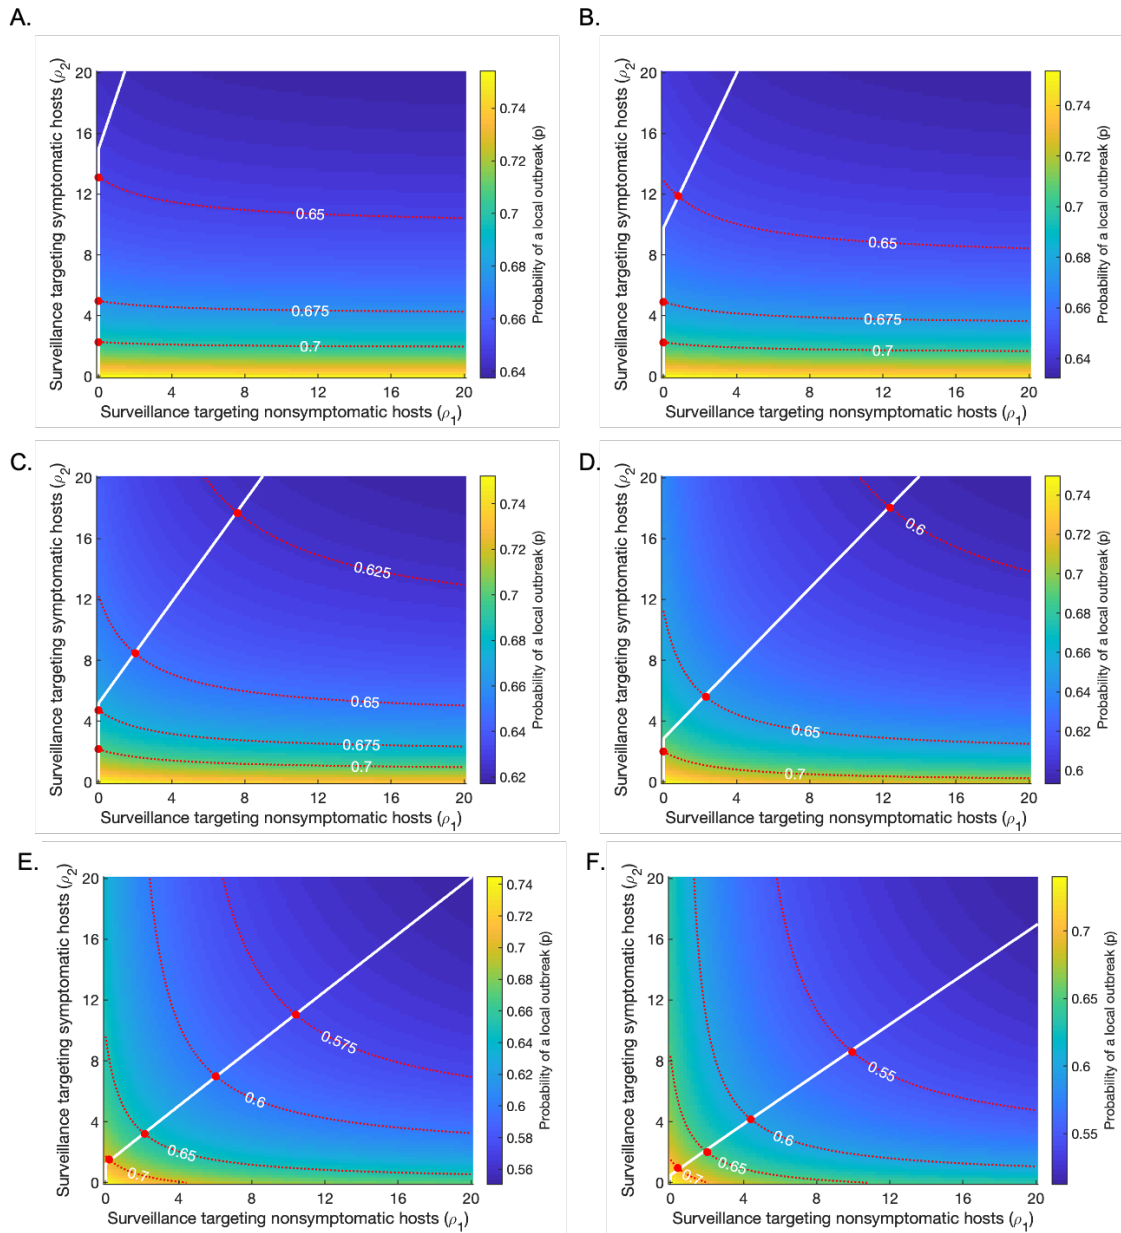

920  
 921 **Fig S8. Varying  $\epsilon$ , the relative isolation rate of nonsymptomatic individuals without intensified**  
 922 **surveillance (compared to symptomatic individuals), from its baseline value ( $\epsilon = 0.1$ ).** Plots are analogous  
 923 to Fig 3D in the main text, showing strategies for minimising the surveillance effort required to achieve a pre-  
 924 specified risk level (an “acceptable” local outbreak probability). Red dotted lines represent contours along which

925 the probability of a local outbreak is constant, as labelled; red circles indicate the points along these contours at  
926 which the total surveillance effort  $\rho_1 + \rho_2$  is minimised. The white line indicates the optimal strategy to follow if  
927 the pre-specified risk level is reduced. Apart from  $\epsilon$  and  $\beta$  (which is changed in each panel to set  $R_0 = 3$ ), all  
928 parameters are held fixed at their baseline values given in Table 1. A.  $\epsilon = 0.01$ . B.  $\epsilon = 0.02$ . C.  $\epsilon = 0.05$ . D.  
929  $\epsilon = 0.1$  (baseline). E.  $\epsilon = 0.2$ . F.  $\epsilon = 0.3$ .  
930

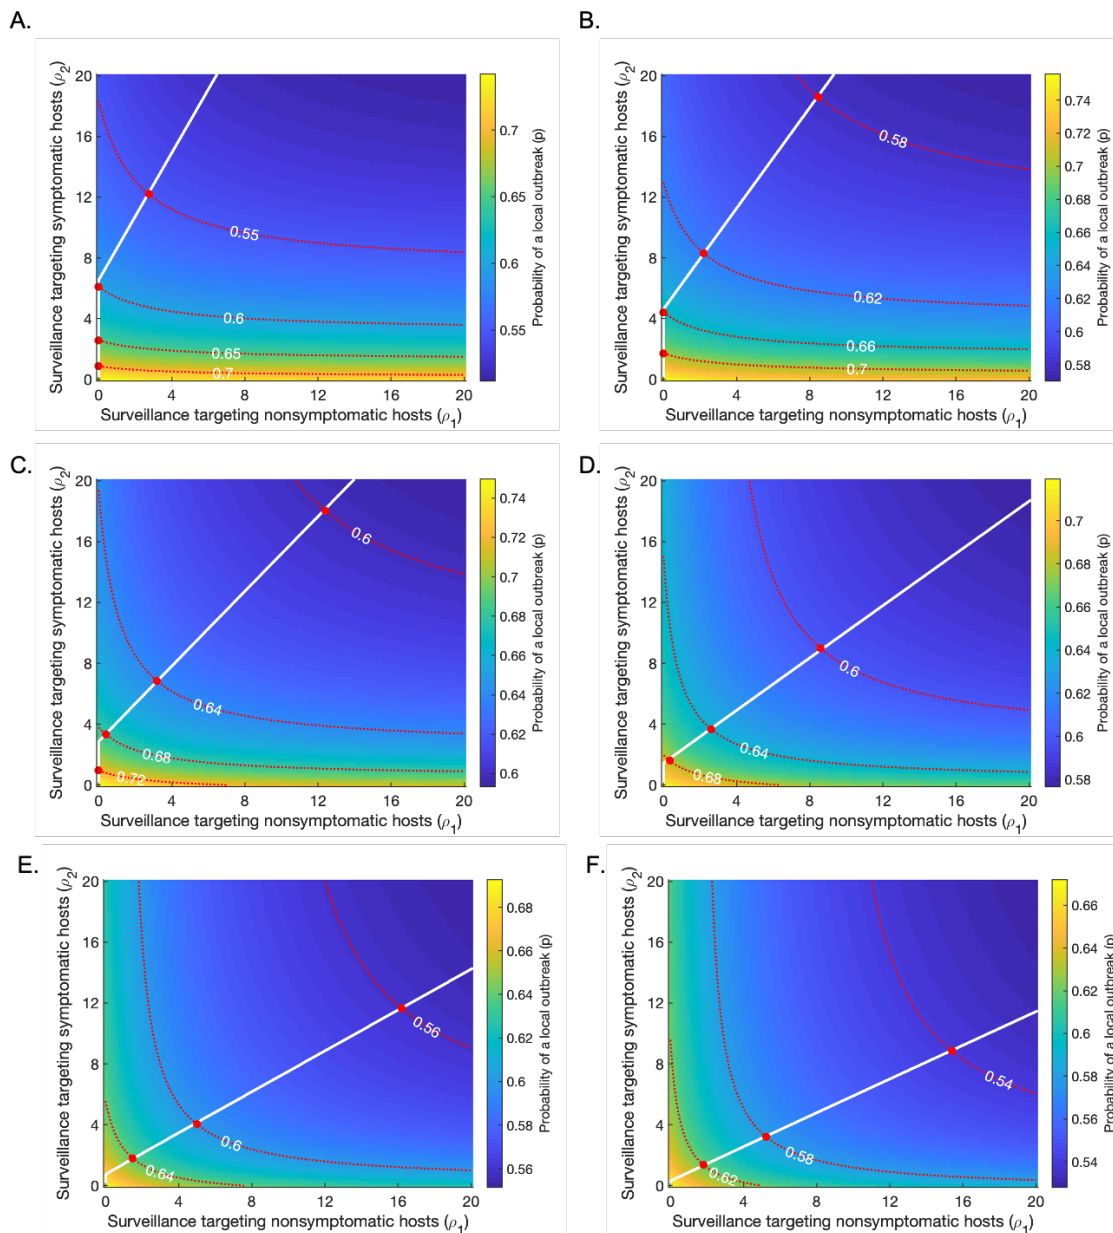

931  
932 **Fig S9. Varying the duration of the presymptomatic period,  $1/\lambda$ , from its baseline value ( $1/\lambda = 0.5$  days).**  
933 Plots are analogous to Fig 3D in the main text, showing strategies for minimising the surveillance effort required



934 to achieve a pre-specified risk level (an “acceptable” local outbreak probability). Red dotted lines represent  
935 contours along which the probability of a local outbreak is constant, as labelled; red circles indicate the points  
936 along these contours at which the total surveillance effort  $\rho_1 + \rho_2$  is minimised. The white line indicates the  
937 optimal strategy to follow if the pre-specified risk level is reduced. Apart from  $\lambda$  and  $\beta$  (which is changed in  
938 each panel to set  $R_0 = 3$ ), all parameters are held fixed at their baseline values given in Table 1. A.  $1/\lambda = 0.5$   
939 days. B.  $1/\lambda = 1$  day. C.  $1/\lambda = 2$  days (baseline). D.  $1/\lambda = 4$  days. E.  $1/\lambda = 6$  days. F.  $1/\lambda = 8$  days.  
940

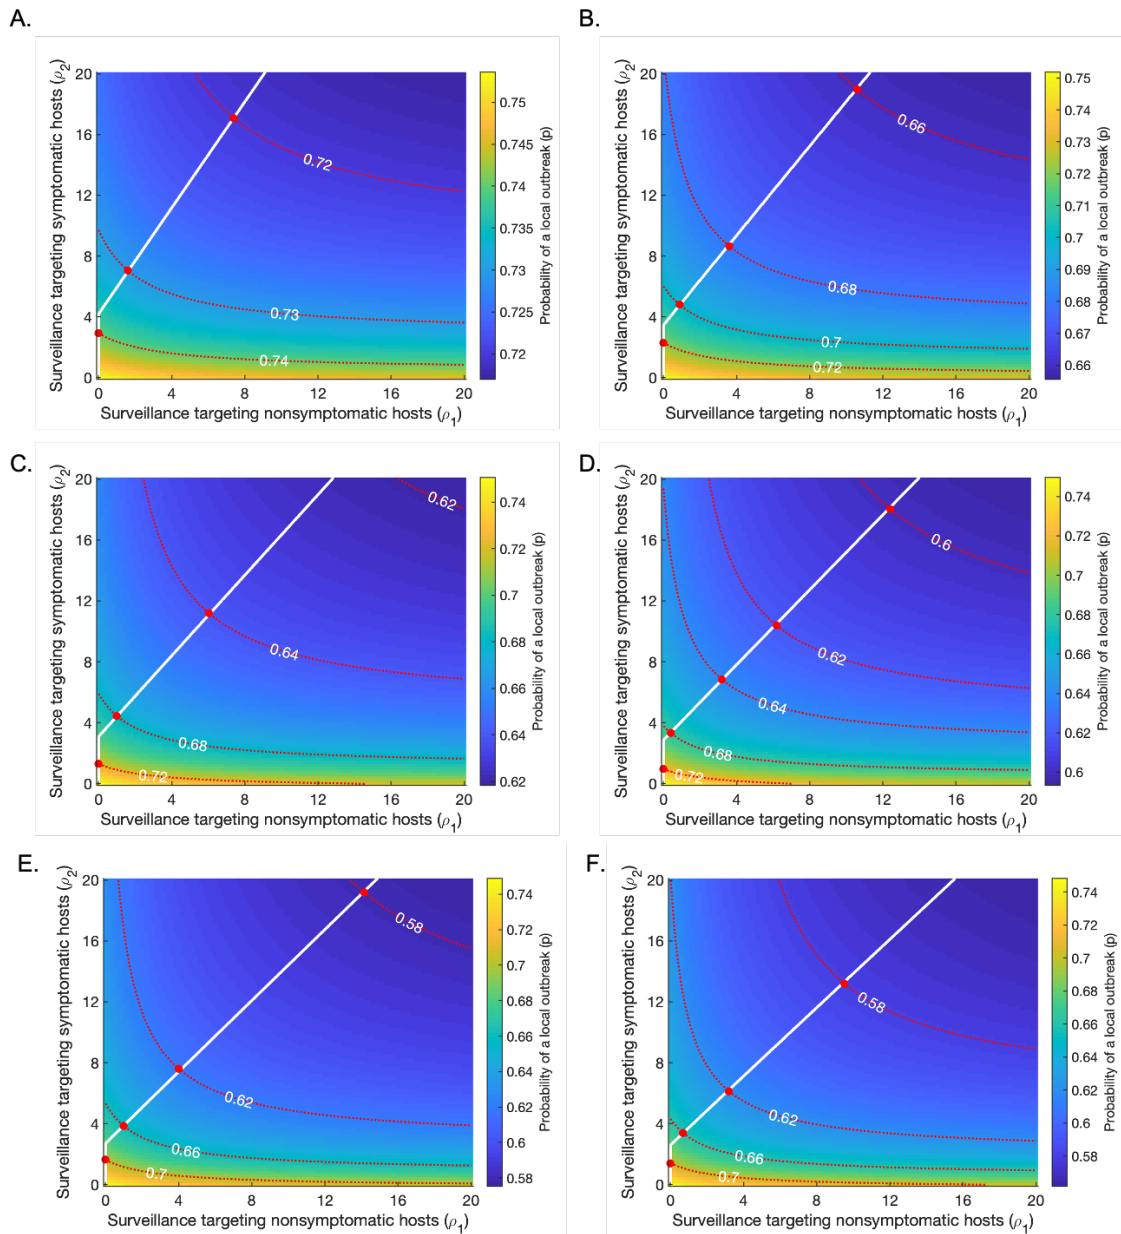

941

942 **Fig S10. Varying the duration of the symptomatic period,  $1/\mu$ , from its baseline value ( $1/\mu = 8$  days).** The  
943 parameter  $\gamma$  is varied simultaneously such that  $1/(\gamma + \mu)$ , the expected time period to isolation conditional on  
944 isolation occurring during the symptomatic period, remains at its baseline value ( $1/(\gamma + \mu) = 4.6$  days). Plots  
945 are analogous to Fig 3D in the main text, showing strategies for minimising the surveillance effort required to  
946 achieve a pre-specified risk level (an “acceptable” local outbreak probability). Red dotted lines represent  
947 contours along which the probability of a local outbreak is constant, as labelled; red circles indicate the points  
948 along these contours at which the total surveillance effort  $\rho_1 + \rho_2$  is minimised. The white line indicates the  
949 optimal strategy to follow if the pre-specified risk level is reduced. Apart from  $\mu$  and  $\gamma$ , and  $\beta$  (which is changed  
950 in each panel to set  $R_0 = 3$ ), all parameters are held fixed at their baseline values given in Table 1. A.  $1/\mu =$   
951 5 days. B.  $1/\mu = 6$  days. C.  $1/\mu = 7$  days. D.  $1/\mu = 8$  days (baseline). E.  $1/\mu = 9$  days. F.  $1/\mu = 10$  days.  
952

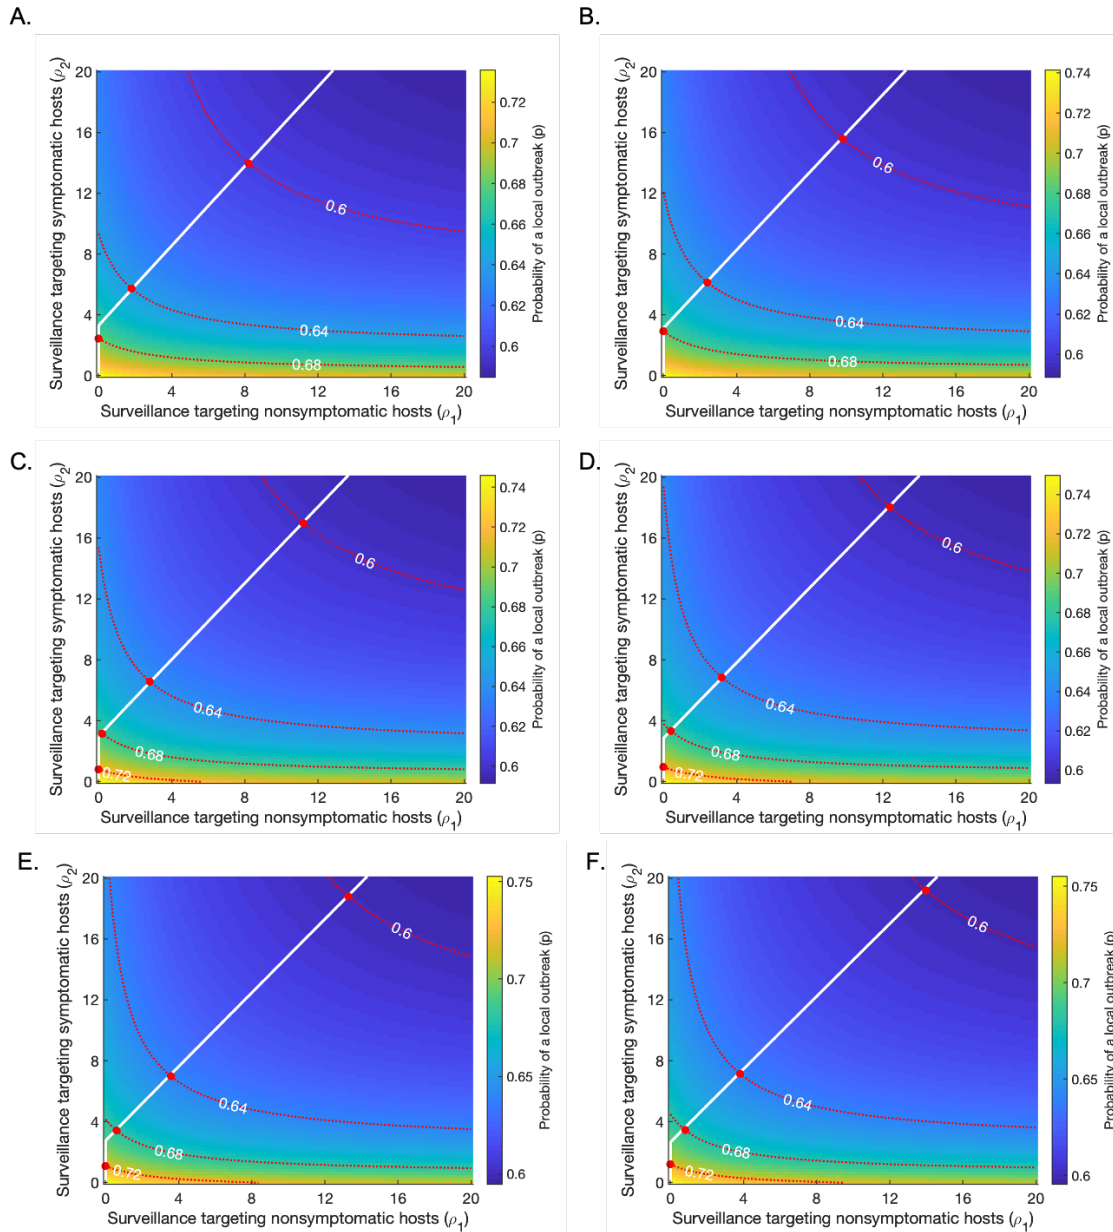

953

954 **Fig S11. Varying  $1/\nu$ , the duration of the asymptomatic period, from its baseline value ( $1/\nu = 10$  days).**

955 Plots are analogous to Fig 3D in the main text, showing strategies for minimising the surveillance effort required

956 to achieve a pre-specified risk level (an “acceptable” local outbreak probability). Red dotted lines represent

957 contours along which the probability of a local outbreak is constant, as labelled; red circles indicate the points

958 along these contours at which the total surveillance effort  $\rho_1 + \rho_2$  is minimised. The white line indicates the

959 optimal strategy to follow if the pre-specified risk level is reduced. Apart from  $\nu$  and  $\beta$  (which is changed in

960 each panel to set  $R_0 = 3$ ), all parameters are held fixed at their baseline values given in Table 1. A.  $1/\nu = 7$

961 days. B.  $1/\nu = 8$  days. C.  $1/\nu = 9$  days. D.  $1/\nu = 10$  days (baseline). E.  $1/\nu = 11$  days. F.  $1/\nu = 12$  days.

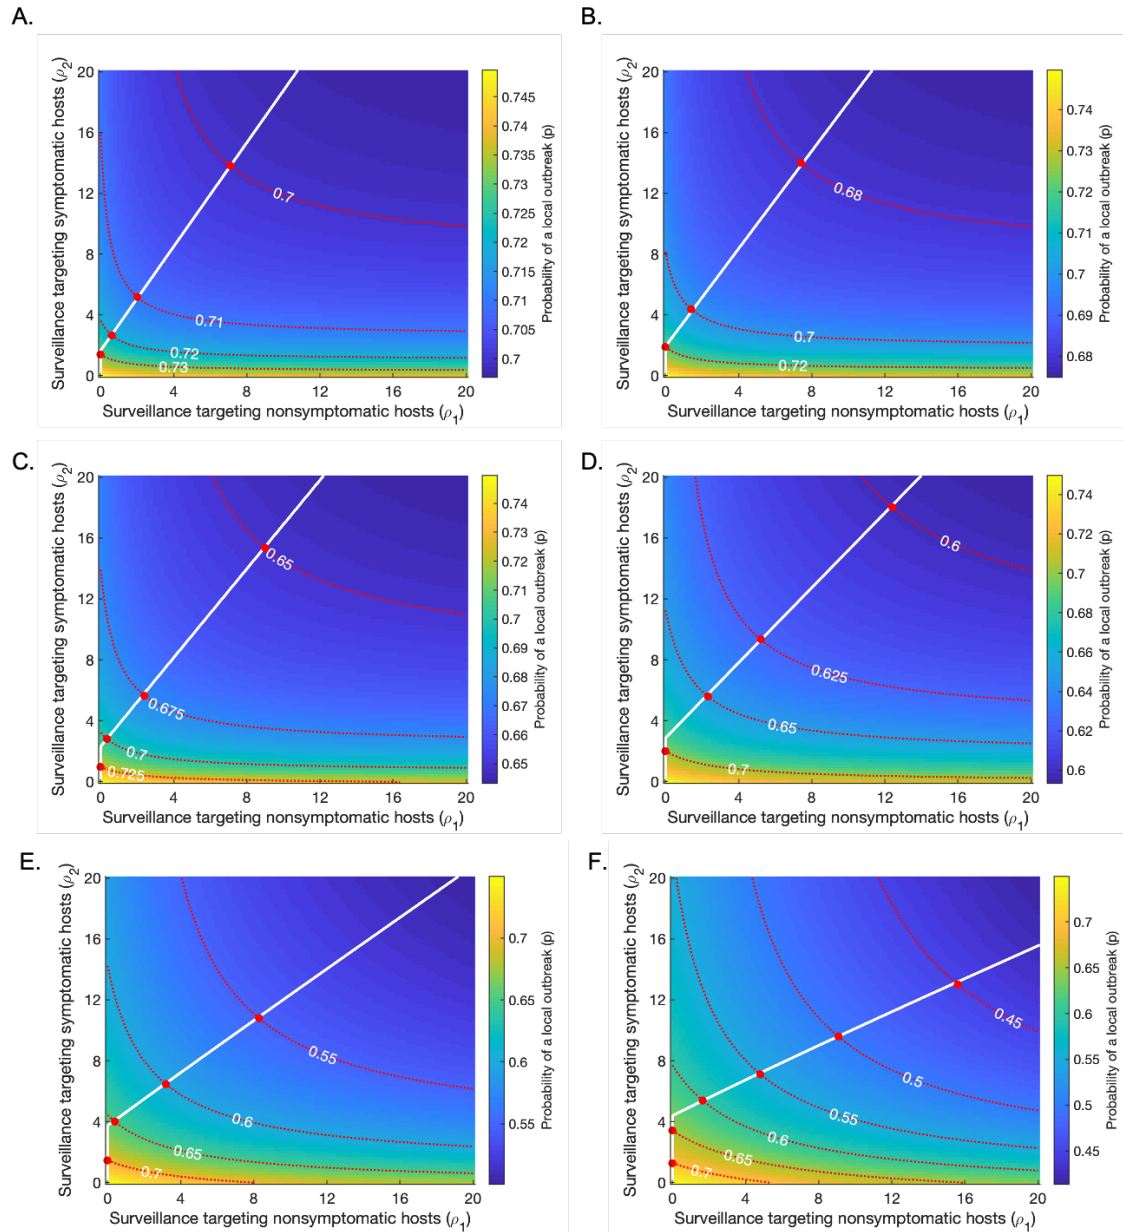

962  
 963 **Fig S12. Varying the upper bound on the fractional reduction in the time to isolation (if no other event**  
 964 **occurs),  $\delta$ , from its baseline value ( $\delta = 0.8$ ).** Plots are analogous to Fig 3D in the main text, showing  
 965 strategies for minimising the surveillance effort required to achieve a pre-specified risk level (an “acceptable”  
 966 local outbreak probability). Red dotted lines represent contours along which the probability of a local outbreak is  
 967 constant, as labelled; red circles indicate the points along these contours at which the total surveillance effort  
 968  $\rho_1 + \rho_2$  is minimised. The white line indicates the optimal strategy to follow if the pre-specified risk level is  
 969 reduced. Apart from  $\delta$ , all parameters are held fixed at their baseline values given in Table 1. A.  $\delta = 0.5$ . B.  $\delta =$   
 970 0.6. C.  $\delta = 0.7$ . D.  $\delta = 0.8$  (baseline). E.  $\delta = 0.9$ . F.  $\delta = 0.95$
